# 1 **An amphipathic helix in Brl1 is required for membrane fusion** 2 **during nuclear pore complex biogenesis in *S. cerevisiae***

3 Annemarie Kralt<sup>1</sup>†, Matthias Wojtynek<sup>1,2</sup>†, Jonas S. Fischer<sup>1</sup>†, Arantxa Agote-Aran<sup>1</sup>, Roberta  
4 Mancini<sup>1</sup>, Elisa Dultz<sup>1</sup>, Elad Noor<sup>3</sup>, Federico Uliana<sup>1</sup>, Marianna Tatarek-Nossol<sup>4</sup>, Wolfram Antonin<sup>4</sup>,  
5 Evgeny Onischenko<sup>5</sup>, Ohad Medalia<sup>2</sup>, Karsten Weis<sup>1</sup>\*

6  
7 <sup>1</sup> Institute of Biochemistry, Department of Biology, ETH Zurich, Zurich CH-8093, Switzerland

8 <sup>2</sup> Department of Biochemistry, University of Zurich, Zurich CH-8057, Switzerland

9 <sup>3</sup> Department of Plant and Environmental Sciences, Weizmann Institute of Science, Israel

10 <sup>4</sup> Institute of Biochemistry and Molecular Cell Biology, Medical School, RWTH Aachen University,  
11 52074 Aachen, Germany

12 <sup>5</sup> Department of Biological Sciences, University of Bergen, Bergen 5020, Norway

13 † These authors contributed equally to this work.

14 \* To whom correspondence should be addressed: karsten.weis@bc.biol.ethz.ch

## 15 **Abstract**

16 The nuclear pore complex (NPC) is the central portal for macromolecular exchange between the nucleus  
17 and cytoplasm. In all eukaryotes, NPCs assemble into an intact nuclear envelope (NE) during  
18 interphase, but the process of NPC biogenesis remains poorly characterized. Furthermore, little is  
19 known about how NPC assembly leads to the fusion of the outer and inner NE, and no factors have  
20 been identified that could trigger this event. Here we characterize the transmembrane protein Brl1 as an  
21 NPC assembly factor required for NE fusion in budding yeast. Brl1 preferentially associates with NPC  
22 assembly intermediates and its depletion halts NPC biogenesis, leading to NE herniations that contain  
23 inner and outer ring nucleoporins but lack the cytoplasmic export platform. Furthermore, we identify  
24 an essential amphipathic helix in the luminal domain of Brl1 that mediates interactions with lipid  
25 bilayers. Mutations in this amphipathic helix lead to NPC assembly defects, and cryo-ET analyses  
26 reveal multi-layered herniations of the inner nuclear membrane with NPC-like structures at the neck,  
27 indicating a failure in NE fusion. Taken together, our results identify a role for Brl1 in NPC assembly  
28 and suggest a function of its amphipathic helix in mediating the fusion of the inner and outer nuclear  
29 membranes.

## 30 Introduction

31 Virtually all biological processes are carried out by multiprotein complexes, and their faithful assembly  
32 is therefore crucial for cellular function (Hartwell et al. 1999). The nuclear pore complex (NPC) is one  
33 of the largest cellular protein complexes, with a total mass of 60-120 MDa. In all eukaryotes, NPCs  
34 perforate the double lipid bilayer of the nuclear envelope (NE) and mediate macromolecular exchange  
35 between nucleus and cytoplasm (Wente and Rout 2010). NPCs are assembled from multiple copies of  
36 ~30 different proteins known as nucleoporins (NUPs), which amount to hundreds of proteins in the  
37 mature complex due to the NPC's eight-fold rotational symmetry (Fernandez-Martinez and Rout 2021;  
38 Lin and Hoelz 2019). NUPs are organized in well-defined sub-complexes (Figure 1A) where the  
39 membrane ring (MR), the central channel (CC) and the inner ring (IR) in the plane of the NE are  
40 sandwiched by two outer rings composed of Y-complexes. Asymmetrically attached to this scaffold are  
41 the cytoplasmic export platform (CP) and the nuclear basket (NB) (Figure 1A) (Fernandez-Martinez  
42 and Rout 2021; Lin and Hoelz 2019).

43 The architecture of the NPC has recently been elucidated in great detail (Akey et al. 2022; Bley et al.  
44 2021; Huang et al. 2021, 2022; Li et al. 2021; Mosalaganti et al. 2021; Petrovic et al. 2021; Schuller et  
45 al. 2021; Tai et al. 2022; Zhu et al. 2022; Zimmerli et al. 2022). Yet far less is known about how this  
46 gigantic complex assembles and gets embedded into the NE. In metazoan cells, which undergo an open  
47 mitosis, two types of NPC assembly mechanisms have been described: mitotic reassembly of NPCs at  
48 the end of cell division and *de novo* formation of NPCs during interphase (Doucet, Talamas, and Hetzer  
49 2010; Otsuka and Ellenberg 2018; Schooley, Vollmer, and Antonin 2012). Organisms that undergo  
50 closed mitosis, such as the budding yeast *Saccharomyces cerevisiae*, exclusively rely on interphase  
51 NPC assembly to create new NPCs (Winey et al. 1997). Here, NUP complexes punch a hole into the  
52 intact NE in order to create the protein-lined membrane tunnel that spans the NE. This requires a poorly  
53 understood fusion event between the inner (INM) and outer (ONM) nuclear membranes during which  
54 the integrity of the NE diffusion barrier is not compromised (Doucet and Hetzer 2010; Rothballer and  
55 Kutay 2013).

56 NPC assembly events are rare (e.g., in yeast ~1-2 NPCs form per minute) (Winey et al. 1997) and  
57 capturing them *in situ* has been challenging. Therefore, NPC biogenesis has mainly been studied using  
58 genetic perturbations that inhibit its maturation. A shared phenotype of many NPC assembly mutants  
59 is the appearance of NE herniations, which likely correspond to halted NPC assembly intermediates  
60 (Thaller and Patrick Lusk 2018). The orientation of these herniations - always bulging out towards the  
61 cytoplasm - suggests an inside-out mechanism of NPC assembly, which is also supported by  
62 observations of interphase assembly states in human cells (Otsuka et al. 2016). To characterize the  
63 precise maturation order and assembly kinetics of native NPC biogenesis in budding yeast, we recently  
64 developed a mass spectrometry-based approach that we termed KARMA (Kinetic Analysis of

65 Incorporation Rates in Macromolecular Assemblies) (Onischenko et al. 2020). This revealed that NPCs  
66 form by sequential assembly of nucleoporins starting with the central scaffold, followed by the outer  
67 cytoplasmic and nucleoplasmic parts and concluded by the late binding of Mlp1, consistent with an  
68 inside-out assembly mechanism (Onischenko et al. 2020).

69 To date, very few non-NPC proteins have been shown to participate in NPC assembly. This is in contrast  
70 to, e.g., ribosome biogenesis, where approximately 180 *trans*-acting assembly factors are known to  
71 interact during the maturation process. These are critical for ribosome-assembly but are not part of the  
72 final structure (Kressler, Hurt, and Bassler 2010; Strunk and Karbstein 2009). The few proteins  
73 suggested to promote interphase NPC assembly include the membrane-bending reticulons (Dawson et  
74 al. 2009), Torsin ATPases (Laudermilch et al. 2016; Rampello et al. 2020), the Ran GTPase and its  
75 regulators (Ryan, McCaffery, and Wentz 2003), and, in budding yeast, a group of three small NE/ER-  
76 located transmembrane proteins: Brl1, its paralogue Brr6 and Apq12 (De Bruyn Kops and Guthrie 2001;  
77 Hodge et al. 2010; Lone et al. 2015; Saitoh, Ogawa, and Nishimoto 2005; Scarcelli, Hodge, and Cole  
78 2007; Zhang et al. 2018, 2021). Temperature-sensitive alleles of *BRL1* and *BRR6* or deletion of *APQ12*  
79 show NE-herniations, an altered cellular membrane composition, synthetic interactions with lipid  
80 biosynthesis pathways and sensitivity to drugs influencing membrane fluidity (Hodge et al. 2010; Lone  
81 et al. 2015; Scarcelli et al. 2007; Zhang et al. 2021). Brl1, Brr6 and Apq12 can be co-  
82 immunoprecipitated, which suggests they form a complex (Lone et al. 2015), and they have been found  
83 to physically interact with NUPs (Zhang et al. 2018). Interestingly, overexpression of Brl1 but not Brr6  
84 can bypass the function of Nup116 and Gle2 in NPC assembly (Liu et al. 2015; Zhang et al. 2018),  
85 suggesting that Brl1 and Brr6 act differently during NPC maturation.

86 Here, we take advantage of our KARMA method (Onischenko et al. 2020) to identify NPC biogenesis  
87 factors. We show that Brl1 transiently binds to immature NPCs and that depletion of Brl1 impairs NPC  
88 assembly, resulting in NE herniations that contain the central scaffold NUPs but lack the cytoplasmic  
89 export platform (Nup82, Nup159). We further identify an essential luminal amphipathic helix (AH) in  
90 Brl1 that interacts with membranes and, when mutated, leads to the formation of large, multi-layered  
91 NE herniations containing immature NPCs that we structurally characterize by cryo-electron  
92 tomography. Our results identify Brl1 as an essential NPC assembly factor and suggest that Brl1  
93 mediates the fusion step between the inner and outer nuclear membranes during interphase NPC  
94 biogenesis via its AH.

95

## 96 **Results**

### 97 **Brl1 binds to assembling nuclear pore complexes**

98 Relying on a large KARMA dataset that contains kinetic interaction profiles for 10 different NUP baits,  
99 we recently demonstrated that yeast NPCs assemble sequentially, starting with the symmetrical core  
100 NUPs (early tier), followed by the majority of asymmetric NUPs (intermediate tier), and concluded by  
101 the assembly of two nuclear basket NUPs Mlp1 and Mlp2 (late tier) (Figure 1A-1B) (Onischenko et al.  
102 2020). This analysis also identified a large number of non-NUP proteins that interact with the baits. We  
103 sought to exploit our dataset to uncover potential NPC assembly factors. Since such factors are expected  
104 to selectively bind to the NPC during its biogenesis but are not part of the mature structure, they should  
105 be enriched in early tier NUP pulldowns versus late tier ones (Figure 1B). Interestingly, out of ~ 1'500  
106 co-purified non-NUP proteins, Brl1 displayed the second highest enrichment score (Figure S1A),  
107 decreasing in abundance approximately five-fold from early to late tier baits (Figure 1C). Only Her1, a  
108 protein with unknown biological function, had a higher early-to-late enrichment ratio. Brl1 has  
109 previously been implicated in NPC biogenesis (Lone et al. 2015; Zhang et al. 2018), and to confirm its  
110 binding preference for early assembling NUPs, we performed the reciprocal affinity pulldowns with  
111 endogenously tagged Brl1. In full agreement, early tier NUPs were enriched over the ones from  
112 intermediate and late assembly tiers (Figure S1B).

113 Brl1's preference for 'young' NPCs was validated by live-cell imaging using the recombination-  
114 induced tag exchange (RITE) approach (Verzijlbergen et al. 2010). We genetically tagged Nup170,  
115 which binds early during NPC biogenesis, with a RITE construct. This allowed us to specifically mark  
116 either old or newly synthesized Nup170 by removing or introducing a yEGFP-tag through inducible  
117 genetic recombination (Figure 1D). Since Nup170 binds early during NPC biogenesis, it can be assumed  
118 that some of the foci formed by newly synthesized Nup170-yEGFP represent NPC assembly  
119 intermediates. As a measure of Brl1 association with young and old NPCs, we monitored co-localization  
120 between Brl1-mCherry and either new or old Nup170-yEGFP using cross-correlation of the NE  
121 fluorescence signals as the readout. As evidenced by a lower cross-correlation score and in agreement  
122 with our KARMA data, Brl1 co-localized well with young but not with old NPCs (Figure 1E-F).  
123 Together, these results indicate that Brl1 preferentially binds to young or immature NPCs, which is  
124 consistent with a function of Brl1 during NPC biogenesis.

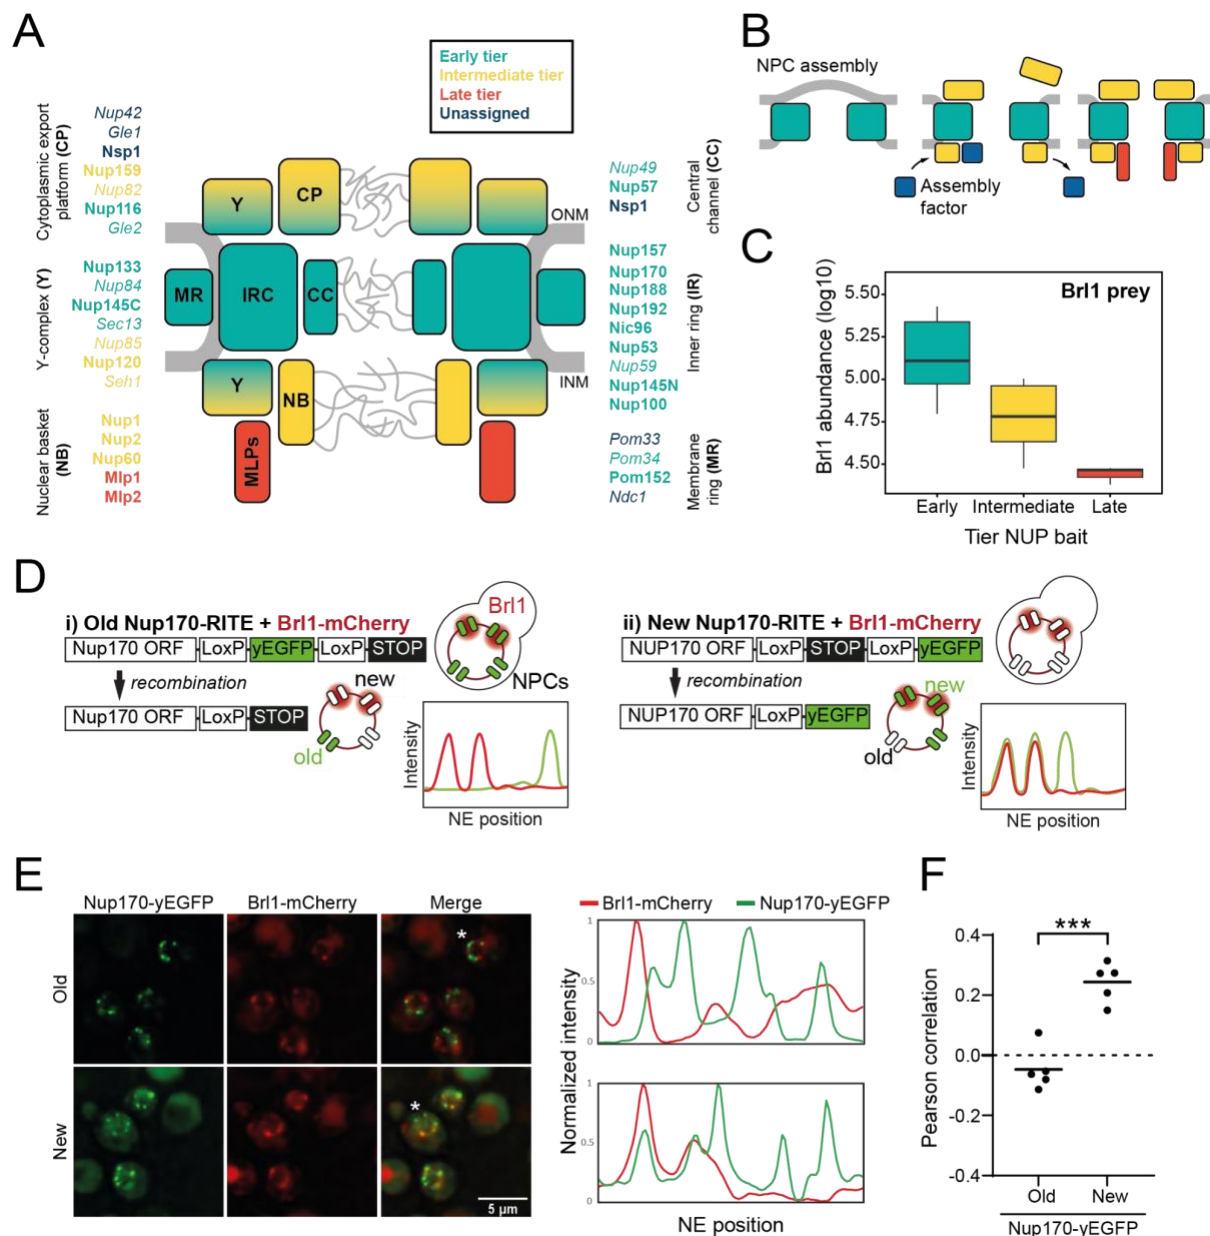

125

126

127

128

129

130

131

132

133

134

135

136

137

**Figure 1: Brl1 preferentially binds young nuclear pore complexes.** **A)** Scheme of the nuclear pore complex architecture. The colors indicate the assembly order as found in Onischenko et al. (Onischenko et al. 2020). NUPs that were reproducibly identified in Brl1 affinity purifications are shown in bold. **B)** Schematic illustrating the transient binding of an NPC assembly factor during NPC assembly. **C)** Enrichment of Brl1 in affinity pull-downs from Onischenko et al. (Onischenko et al. 2020) using baits from the different assembly tiers. Early and intermediate tiers contain four different baits each; the late tier is represented by Mlp1 with three biological replicates for each bait. **D)** Schematic representation of the RITE strategy to visualize Brl1-mCherry co-localization with old or new NPCs marked by Nup170-yEGFP and the expected NE fluorescence intensity profiles. **E)** Representative co-localization images of Brl1-mCherry with old or new Nup170-yEGFP marked NPCs using the RITE strategy described in 1D. Cells were imaged ~30min or ~5h after recombination induction, respectively. Fluorescence intensity profiles along the NE are displayed for cells denoted with an asterisk (\*). **F)** Pearson correlation between Nup170-yEGFP and Brl1-mCherry fluorescence intensity profiles along the NE in

138 1E. Individual points reflect the average of a biological replicate with a minimum of 28 analyzed NE contours per  
139 condition. Two tailed Student's t-test (n = 5, p value = 0.00015).

140

141 Taking advantage of our KARMA workflow, we next set out to determine more precisely the stage  
142 during which Brl1 acts in NPC biogenesis. In KARMA, newly synthesized proteins are pulse labeled  
143 by heavy-isotope amino acids followed by the pulldown of the NPC via an endogenously tagged affinity  
144 bait at several post-labeling time points (Figure 2A) (Onischenko et al. 2020). The extent of metabolic  
145 labeling of any co-isolated protein is indicative of its average age in the affinity pulldown (AP) fraction  
146 (Figure 2A). Therefore, the 'young' structural intermediates that are bound by a *bona fide* assembly  
147 factor during biogenesis should display a higher metabolic labeling rate in APs compared to the labeling  
148 of bulk cellular proteins. By contrast, structural components that join after the assembly factor has left  
149 the NPC assembly site are not expected to show this effect, even if the assembly factor does not  
150 dissociate completely (Figure 2A). Nuclear transport receptors (NTRs) that bind the NPC highly  
151 transiently serve as a reference for bulk cellular protein labeling to discriminate between young and old  
152 proteins.

153 In KARMA assays with endogenously tagged Brl1, we were able to detect most NUPs (Figure 1A) with  
154 highly reproducible labeling readouts between biological replicates (Figure S1C, S1D). Strikingly, the  
155 NUP labeling rates observed with Brl1 as bait were overall significantly higher compared to the ones  
156 in KARMA assays with NUP baits (Onischenko et al. 2020) (Figure 2B). On top, we observed that in  
157 Brl1 pulldowns, early tier NUPs were labeled outstandingly fast, exceeding NUPs from the intermediate  
158 or late tiers and even the NTRs - our reference of the bulk cellular proteins (Figure 2B, 2D, S1D). In  
159 line with this, our quantitative analysis of NUP metabolic labeling rates using a previously developed  
160 kinetic state model (KSM) (Onischenko et al. 2020), revealed that early tier NUPs become inaccessible  
161 to the Brl1 bait in mature NPCs (Figure 2C) (Supplementary Results: "*Kinetic state modeling*"), likely  
162 as a result of the dissociation of Brl1 at later stages of NPC assembly (Figure 1B). Although most NUPs  
163 from late and intermediate tiers were still detected in the KARMA assays, they did not display elevated  
164 labeling rates and even showed significant labeling delays as in the case of Mlp1, Nup159 and Nsp1  
165 (Figure 2D). Altogether these results show that Brl1 preferentially binds NPC assembly intermediates  
166 that are composed of the central scaffold (early tier) but lack the peripheral nucleoplasmic and  
167 cytoplasmic structures (intermediate and late tier) (Figure 2E). Of note, the labeling differences we  
168 observed cannot be explained by variations in NUP turnover as evidenced by the analysis of NUP  
169 labeling rates in the source cell lysates (Supplemental results: "*Analysis of protein labeling in source  
170 lysate*"). Moreover, it is likely that the observed contrast in the labeling rates is significantly  
171 underestimated due to intermixing of Brl1-purified NUP species during the AP procedure  
172 (Supplemental results "*Lysis intermixing assays*").

173

174  
175

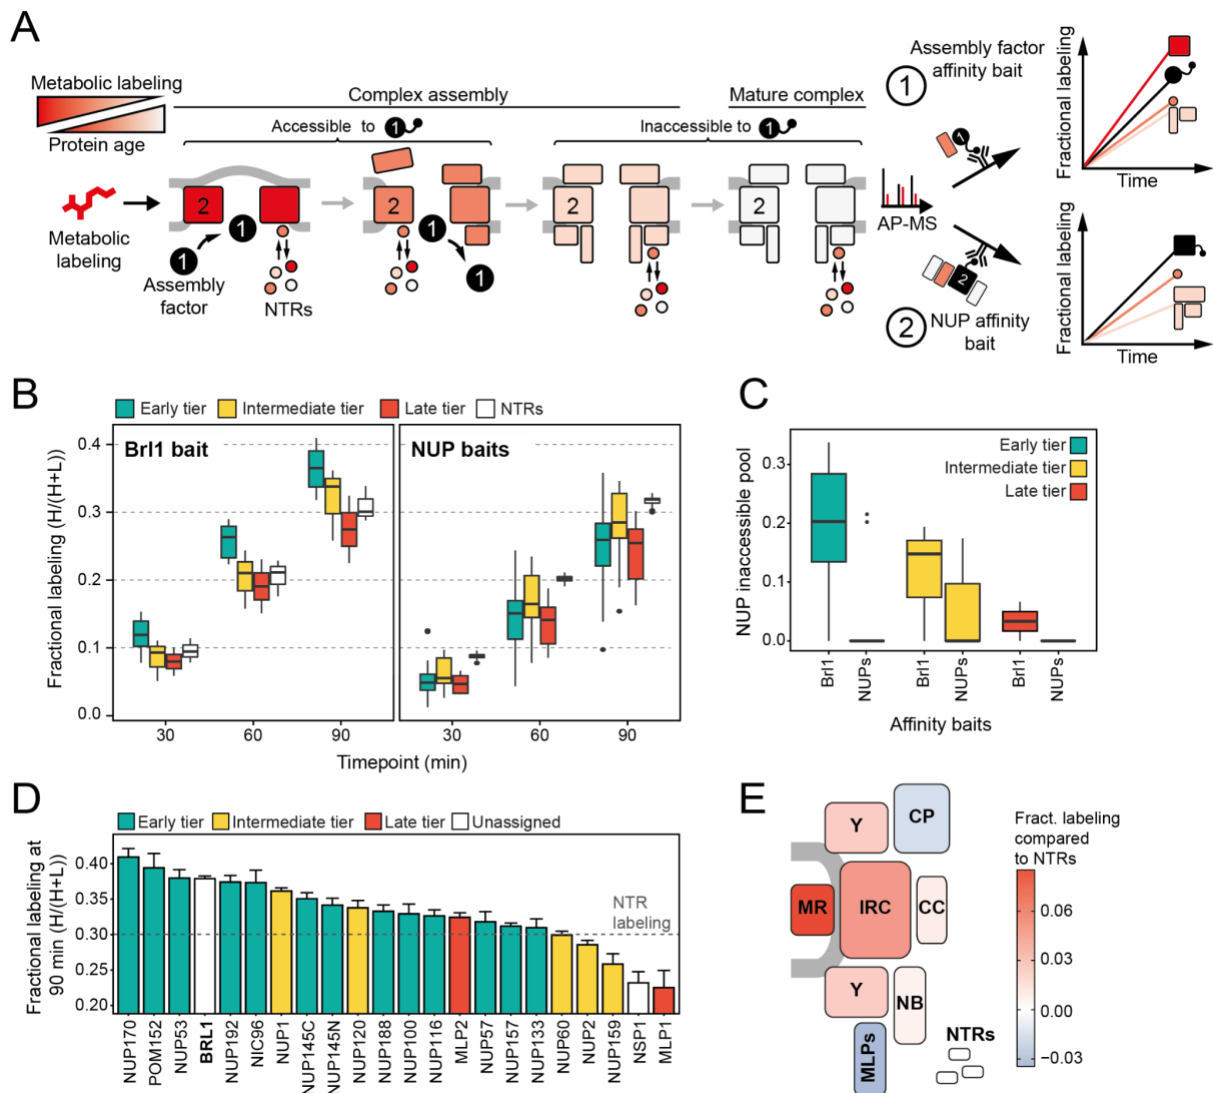

176

177 **Figure 2: Mapping Brl1 association with NPC assembly intermediates using KARMA.** A) Principles of  
178 KARMA: Newly synthesized proteins are pulse-labeled followed by the affinity purification of the NUP  
179 complexes through a tagged NPC-binding protein. The extent of metabolic labeling is then quantified by mass  
180 spectrometry and corresponds to the average protein age in the affinity-purified fraction. An assembly factor  
181 selectively binds young NPCs, thus leading to high metabolic labeling rates for NUPs present in the intermediates  
182 (1). This is not the case for proteins that join after the assembly factor completely or partially dissociates or when  
183 the process is probed with a NUP bait (2). B) Comparison of the labeling rates for NUPs and NTRs in KARMA  
184 assays with Brl1 bait (left, this study) and with ten different NUP baits (right, (Onischenko et al. 2020)). Median  
185 of three biological replicates. C) Inaccessible pool of NUPs in KARMA assays with Brl1 compared to NUP baits  
186 (Onischenko et al. 2020), evaluated using a three-state KSM (Onischenko et al. 2020). D) Barplot depicting the  
187 extent of metabolic labeling for different NUPs in KARMA assays with Brl1 bait after 90 min. The dotted line  
188 indicates the median NTR labeling. Median  $\pm$  SD of three biological replicates. E) Fractional labeling values from  
189 2D averaged for NPC sub-complexes and offset by NTR labeling projected onto the NPC scheme.

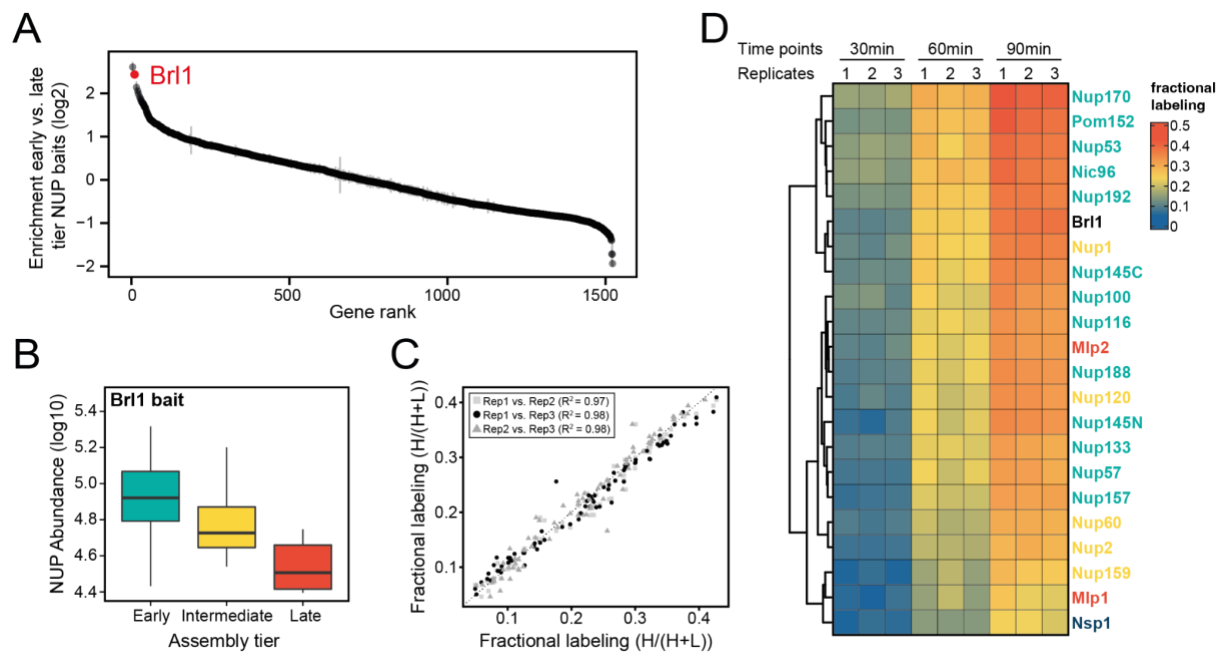

190

191 **Figure S1: Proteomic characterization of Brl1 NPC interactions.** **A)** All 1'500 proteins co-purified in affinity  
 192 pulldowns with ten different NUP baits (Onischenko et al. 2020) were ranked by their fold enrichment difference  
 193 between early and late tier baits. Mean  $\pm$  SEM of three biological replicates. **B)** Log10 abundance of NUPs  
 194 belonging to the different assembly tiers in Brl1 APs. Values for three biological replicates. **C)** Reproducibility  
 195 of the fractional labeling in KARMA assays with Brl1. Individual points correspond to the fractional labeling of  
 196 a protein. **D)** Heatmap showing the fractional labeling of NUPs in KARMA assays with Brl1 bait.

197

## 198 Depletion of Brl1 interferes with NPC maturation

199 Having established that Brl1 interacts with immature NPCs, we wanted to elucidate how the absence of  
 200 Brl1 affects NPC assembly. Since Brl1 is encoded by an essential gene, we used the auxin-inducible  
 201 degron (AID) system, which allows for the acute depletion of proteins (Figure S2A) (Nishimura et al.  
 202 2009). Upon addition of auxin, ~65% of Brl1 was rapidly degraded within 15 minutes (Figure S2B),  
 203 leading to a reduction in growth rate (Figure S2C). To characterize whether Brl1 degradation affected  
 204 the NPC ultrastructure, we treated cells for 4-4.5 hours with auxin and then subjected them to cryo-  
 205 focused ion beam (FIB) milling and cryo-electron tomography (cryo-ET). As expected, we found  
 206 mature NPCs (Figure 3A ii white arrow and Movie S1) in the NE of auxin-treated cells, but also detected  
 207 small electron-dense INM evaginations (Figure 3A iii and Movie S2) along the NE. Additionally, we  
 208 observed that Brl1-depleted cells have electron-dense NE herniations (Figure 3A black arrows and  
 209 Movies S1 and S2) similar to the ones commonly observed in NPC assembly mutants (Thaller and  
 210 Patrick Lusk 2018) and previously also seen for Brl1/Brr6 double-depleted cells (Zhang et al. 2018). In  
 211 our control strain lacking the auxin receptor *OsTir1*, no herniations could be detected after auxin



212 treatment (Figure 3B, Movies S3 and S4). However, we infrequently observed INM evaginations  
213 (Figure 3B, Movie S3), indicating that these could represent regular NPC intermediates.

214 Interestingly, the herniations that we observed upon Br11 degradation were often clustered and enclosed  
215 by a continuous ONM (Figure 3A ii and iv, Movies S1 and S2). Closer inspection revealed densities  
216 likely corresponding to the inner ring (IR, Figure 1A) at the apex of the INM (Figure S2D ii).  
217 Subtomogram averaging and single subtomograms of the NE herniations also indicate the presence of  
218 a nucleoplasmic density, likely corresponding to the nucleoplasmic Y-complex ring as previously  
219 reported by Allegretti and coworkers (Figure S2D ii) (Allegretti et al. 2020). While the subtomogram  
220 averaging of INM evaginations did not reveal distinct densities likely because of their high  
221 heterogeneity and the limited number of analyzed subtomograms, the average of mature NPCs extracted  
222 from the same dataset displayed a similar architecture as previously reported in higher resolution  
223 subtomogram averages (Akey et al. 2022; Allegretti et al. 2020) (Figure S2D ii and iii, S2E).  
224 Occasionally we also observed luminal densities at the herniations, likely corresponding to the Pom152  
225 luminal ring (Akey et al. 2022; Upla et al. 2017; Zimmerli et al. 2022) (Figure S2F). This is in line with  
226 our KARMA data, suggesting that Pom152 is already present in assembling NPCs prior to Br11  
227 recruitment (Figure 2D-2E and S1D).

228 To further characterize the composition of the NPC intermediates in Br11-depleted cells, we investigated  
229 the localization of yEGFP-tagged Nups after auxin addition (Figure 3C-3D). Consistent with our EM  
230 data, the inner ring complex NUPs (Nup170 and Nup192), the Y-complex members (Nup133 and  
231 Nup85) and linker NUPs (Nup100 and Nup116) retained a prominent NE localization, while the  
232 cytoplasmic export platform NUPs (Nup82 and Nup159) were mislocalized in bright foci. Interestingly,  
233 the nuclear basket NUPs (Nup60 and Mlp1) also readily localized at the nuclear envelope. We thus  
234 conclude that NPC structures that accumulate upon Br11 depletion contain the central scaffold and the  
235 nuclear basket structure but lack the cytoplasmic face of the NPC (Figure 4D right).

236 To exclude that mature NPCs are affected by the depletion of Br11, we monitored NUPs synthesized  
237 before and after Br11 depletion separately using RITE (Figure 3E) (Verzylbergen et al. 2010). New  
238 Nup188, Nup133 and Mlp1 still localize to the NE homogeneously, whereas new Nup82 forms bright  
239 foci either in the cytoplasm or NE (Figure 3F). By contrast, the localization of old proteins was not  
240 affected for any tested NUP. Together, our results reveal that removal of Br11 triggers the formation of  
241 NE herniation as a consequence of halted NPC assembly, whereas previously assembled NPCs are not  
242 affected by the lack of Br11.

243

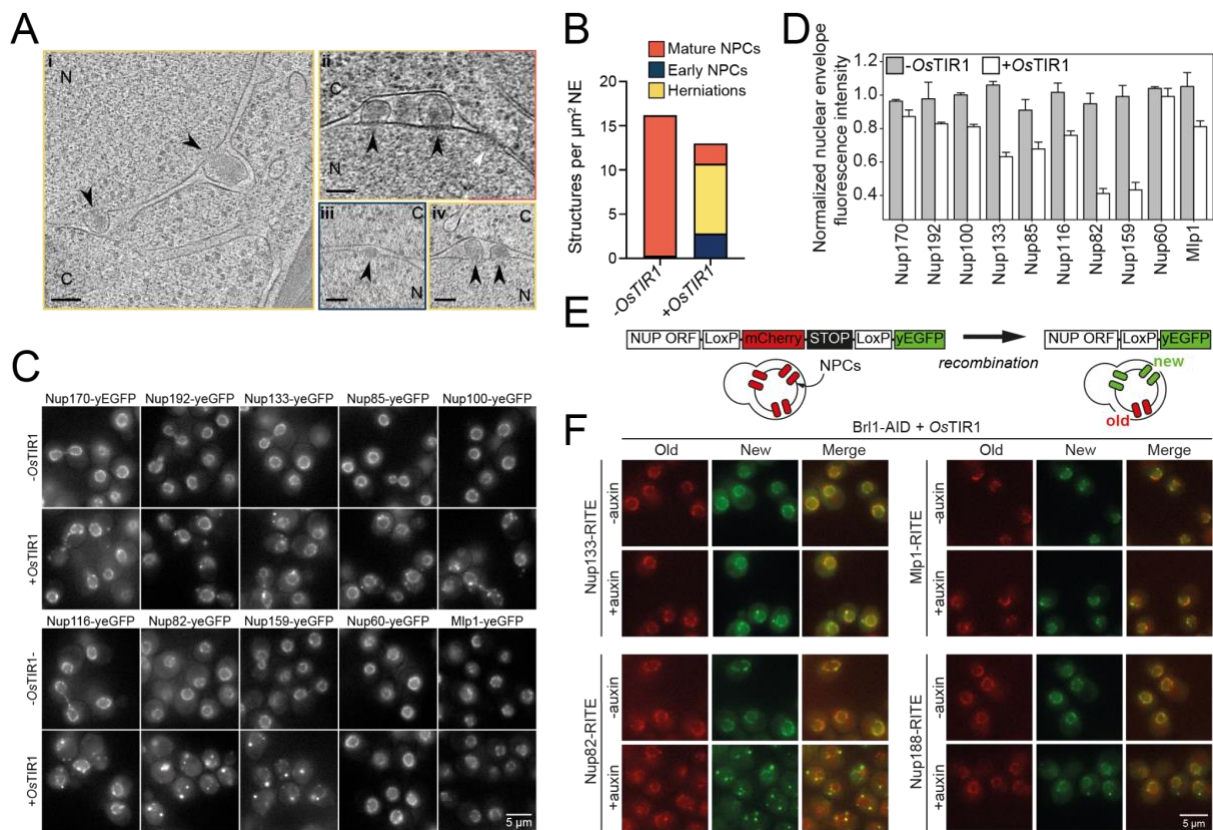

244

245

246

247

248

249

250

251

252

253

254

255

256

257

**Figure 3: Brll1 degradation interferes with NPC assembly.** **A)** Tomographic slices of FIB-milled, 4-4.5 h auxin-treated Brll1-AID cells showing the structures quantified in 3B. Image frames colored according to the color code used in B). Scale bar 100 nm, black arrows: herniations, white arrow: NPC, N: Nucleus, C: Cytoplasm; slice thickness i and iii: 1.4 nm, ii and iv: 2.8 nm. Panels i and ii are cropped from tomographic slices from the tomograms in movies S1 and S2 **B)** Quantification of 27 tomograms ( $8.5 \mu\text{m}^2$  NE) and 51 ( $16.7 \mu\text{m}^2$  NE) for -*OsTir1* and +*OsTir1* respectively. **C)** Example fluorescent micrographs of yEGFP-tagged NUPs in 4-4.5 h auxin treated Brll1-AID +/- *OsTIR1* cells. **D)** Normalized fluorescence intensity signal in the nuclear envelope in +/- *OsTIR1* Brll1-AID cells treated with 500  $\mu\text{M}$  auxin for 4-4.5 h. Mean  $\pm$  SEM of a minimum of two biological replicates. **E)** Recombination-induced tag exchange (RITE) method is combined with a CRE-EBD recombinase to conditionally switch fluorescence tags upon  $\beta$ -estradiol addition. **F)** NUP RITE fusion protein localization in the Brll1-AID background 3 h after treating cells with auxin (+auxin) or ethanol (-auxin). Recombination was induced 30 min prior to auxin addition.

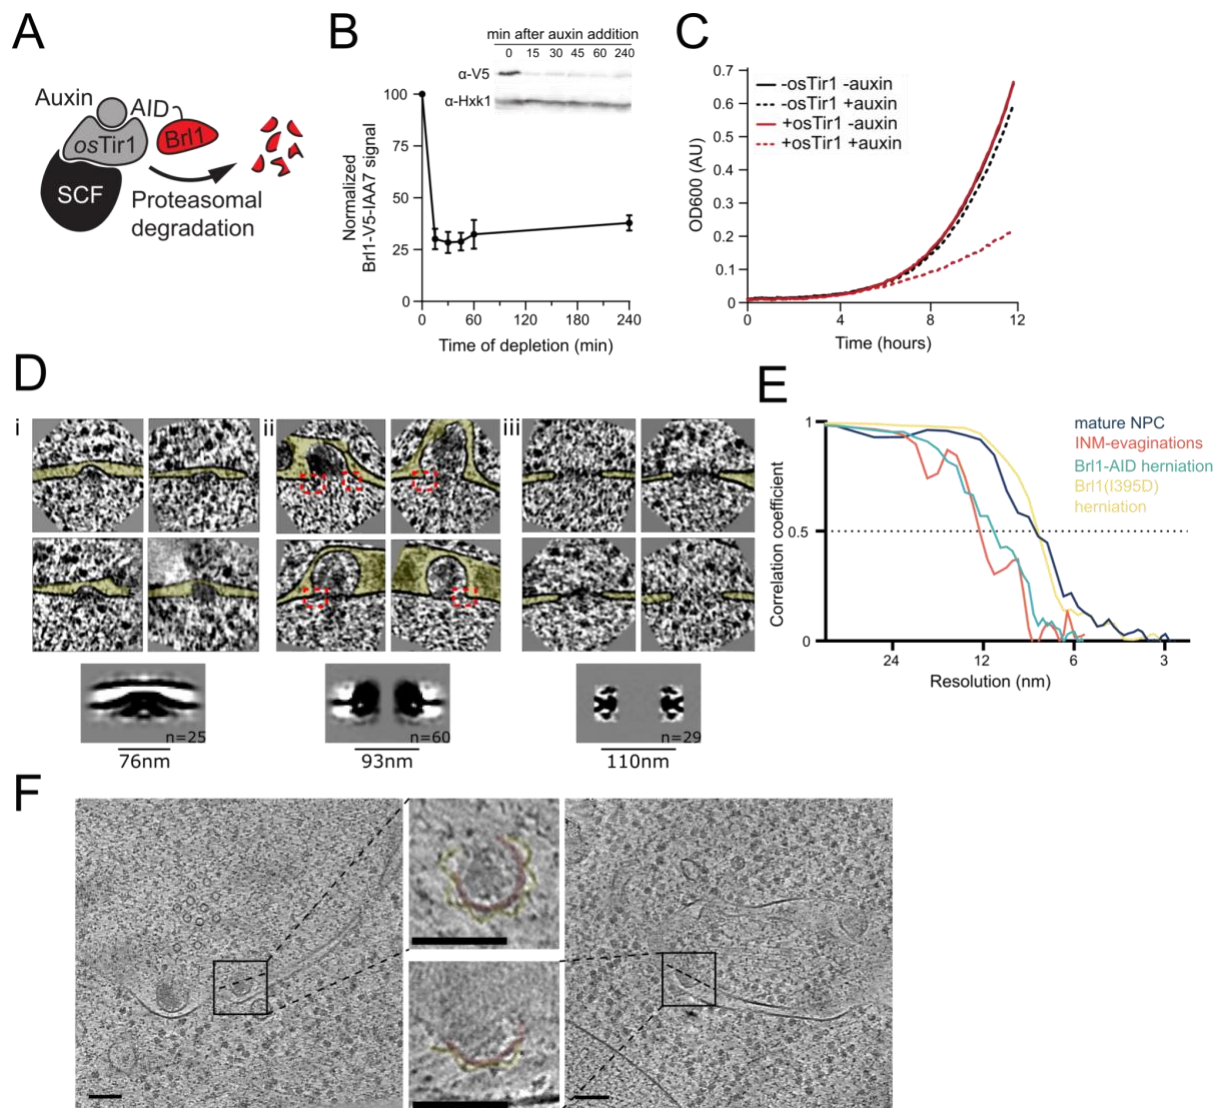

258

259 **Figure S2: Characterization and subtomogram analysis of Br11 depletion.** **A)** Auxin-inducible degradation  
 260 of Br11 (Nishimura et al. 2009). Interaction between degron-tagged Br11 and the E3 ubiquitin ligase SCF is  
 261 mediated by the auxin binding receptor *OsTir1*. **B)** Depletion of Br11-AID monitored by Western blotting. Br11-  
 262 V5-IAA7 was detected with an anti-V5 antibody, anti-Hexokinase served as loading control. Mean ± SEM of  
 263 three biological replicates. **C)** Growth rate of Br11-AID ±*OsTir1* cells incubated with 500 μM auxin or an  
 264 equivalent amount of ethanol (-auxin). **D)** Subtomograms and subtomogram averages of NPCs and NPC-like  
 265 structures in Br11-depleted conditions; (i) INM-evaginations, (ii) NE-herniations, (iii) mature NPCs. Diameter  
 266 and number of particles are indicated. Cytoplasm is pointing up in all images. Box size of single herniations/NPCs  
 267 is 270 nm. **E)** Fourier shell correlation curves for the subtomogram averages in figure S2D and figure 7C.  $FSC_{0.5}$   
 268 indicated as dotted line **F)** Tomographic slices of FIB-milled 4-4.5h auxin treated Br11-AID cells; Slices through  
 269 herniations show a luminal ring around the herniation, highlighted in yellow, NPC-membrane in red; the rotation-  
 270 axis is indicated by a dashed line; scale bars: 100 nm; slice thickness: 1.4 nm.

271

272 To systematically explore the composition of the NPC assembly intermediates that accumulate in the  
273 absence of Brl1, we once more employed metabolic labeling coupled to affinity purification mass  
274 spectrometry. We used Nup170 as an affinity bait since it binds early during NPC maturation  
275 (Onischenko et al. 2020) enabling us to purify both mature NPCs and intermediate structures upon Brl1  
276 depletion (Figure 4A). To this end, we pulse-labeled newly synthesized proteins in parallel with the  
277 induction of Brl1 degradation, and subsequently quantified the metabolic labeling for all co-purified  
278 proteins. For NUPs that are able to assemble into intermediates in the absence of Brl1, we expect to  
279 find a mixture of unlabeled (old) and labeled (new) proteins in Nup170 APs. However, for NUPs  
280 dependent on Brl1 for their assembly, only pre-assembled, old proteins will be captured. Thus, proteins  
281 dependent on Brl1 for their incorporation are expected to have slower labeling rates (Figure 4A).  
282 In Brl1-depleted cells, the metabolic labeling of NUPs was generally slower than for the bulk of co-  
283 purified proteins. Such a delay was not observed in control cells implying that the NPC maturation  
284 process is affected when Brl1 is depleted (Figure 4B). Importantly, the labeling delay was not identical  
285 for all NUPs (Figure 4C). While most membrane ring, nuclear basket, and inner ring complex NUPs  
286 were labeled comparable to the dynamic NTRs, the cytoplasmic export platform NUPs and Mlp1  
287 incorporated labeling substantially slower (Figure 4D left). This is in agreement with the densities  
288 observed by cryo-ET and corroborates that the observed herniations are indeed incomplete NPC  
289 assembly intermediates that have not yet acquired the cytoplasmic structure and that Mlp1 is recruited  
290 very late to the NPC. Of note, the differences in NUP labeling observed upon Brl1 depletion with  
291 Nup170 correlate well with the labeling rates in KARMA assays with Brl1 bait (Figure S3A). This  
292 indicates that most NUPs which assemble after the Brl1-dependent assembly step (slow labeling in  
293 KARMA assays with the Brl1 bait) can no longer incorporate into the NPC once Brl1 is degraded (slow  
294 labeling in KARMA assays when Brl1 is depleted).  
295 Of note, the metabolic labeling of the bulk of co-purified proteins was also overall delayed upon Brl1  
296 depletion (Figure 4B). This is consistent with the decreased growth rate that can be observed in these  
297 conditions (Figure S2C). Interestingly, the analysis of NUP exchange rates during the AP procedure  
298 using cell lysate intermixing assays showed a significantly higher degree of exchange in the Nup170  
299 APs when Brl1 was depleted (Figure S3B-S3D). This might suggest that the immature pores that  
300 accumulate in the absence of Brl1 are less stable than fully assembled NPCs. Importantly, such dynamic  
301 exchange leads to the intermixing of labeled and unlabeled constituents of the NPC and thus the labeling  
302 delays that we observe in the Nup170 APs are likely underestimations.  
303

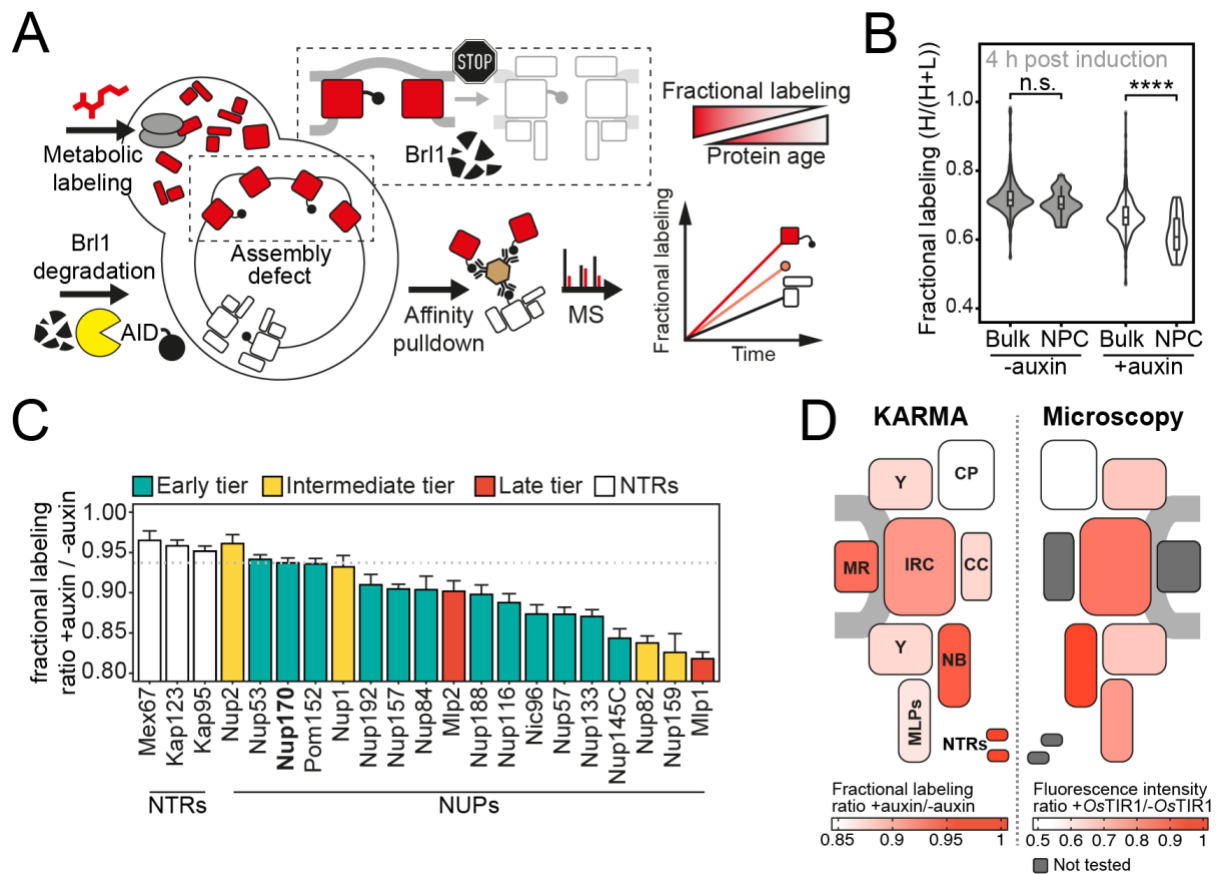

304

305 **Figure 4: Proteomic characterization of NPC assembly intermediates induced by Br11 depletion. A)**

306 Depiction of the metabolic labeling assays to examine NPC assembly effects that occur upon Br11 degradation.

307 Newly synthesized proteins are pulse-labeled simultaneously with the auxin-induced depletion of Br11. Mature

308 NPCs and assembly intermediates are purified via affinity tagged Nup170. Newly made NUPs that depend on

309 Br11 for their incorporation cannot be purified with Nup170, thus diminishing the extent of their metabolic labeling

310 in Nup170 AP after Br11 depletion. **B)** Fractional labeling of bulk proteins compared to NUPs in KARMA assays

311 with affinity tagged Nup170 in Br11-AID cells treated with auxin (+auxin) or ethanol (-auxin) for 4 h. Data points

312 correspond to the median values in three biological replicates. Two tailed Student's t-test (p value: n.s. > 0.05 and

313 \*\*\*\* < 0.0001). **C)** Fractional labeling ratio of NUPs (bars) and bulk proteins (dotted line) in Nup170 APs from

314 Br11-AID cells treated with auxin (+auxin) or ethanol (-auxin). Mean  $\pm$  SEM of three biological replicates and

315 three time points (4, 4.5 and 5 h post treatment, n = 9). Mlp1 and Mlp2 are missing in one replicate of the 4.5 time

316 point (n = 8). **D)** Left: fractional labeling ratios from 4C averaged per sub-complex and projected onto the NPC

317 schematic. Right: Nuclear envelope fluorescence intensity signal ratio from Figure 3D averaged for NPC sub-

318 complexes and projected onto the NPC schematic

319

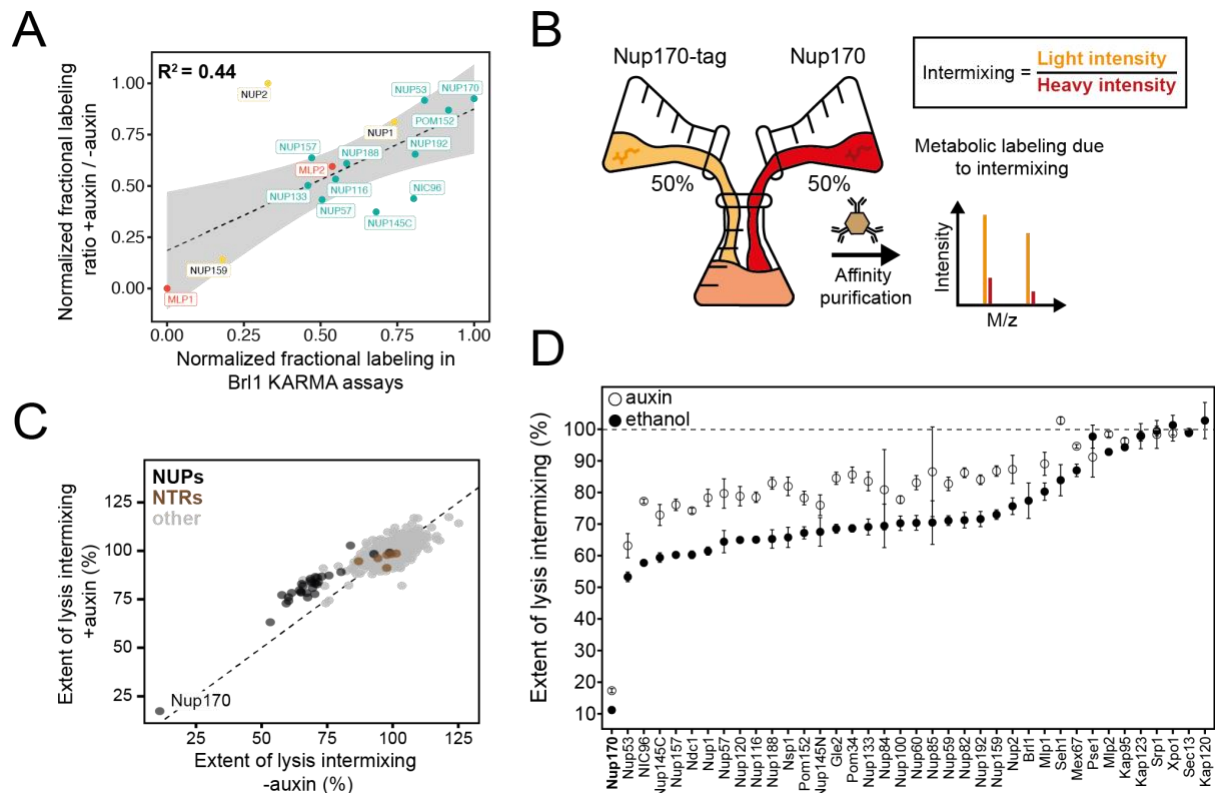

320

321 **Figure S3: Exchange rates of NPC assembly intermediates in Br11-depleted cells.** **A)** Correlation between  
 322 NUP fractional labeling observed in Br11 KARMA assays with the fractional labeling ratios in Nup170 AP from  
 323 Br11-AID cells with auxin or ethanol treatment. **B)** Lysate intermixing assay to test the extent of dynamic exchange  
 324 during the AP procedure. Br11-AID cells are either treated with auxin or ethanol for 5 h, then equal fractions of  
 325 cell culture expressing tagged Nup170, grown in light lysine medium and wild type culture grown in metabolic  
 326 labeled medium were subjected to the AP procedure. **C)** Intermixing of NUPs (black) and NTRs (brown) along  
 327 with other co-purified proteins (gray) with auxin or ethanol treatment. Values are normalized to the mean  
 328 intermixing of all co-purified non-NUP proteins in a sample (=100%). **D)** Intermixing extent for NUPs and NTRs  
 329 in Nup170 APs in Br11-AID cells treated with auxin (black) or ethanol (white). Normalized as in 3C. Median  $\pm$   
 330 SD of three biological replicates.

### 331 **Brl1 contains an essential luminal amphipathic helix**

332 So far, our analyses showed that Brl1 is an NPC assembly factor: it predominantly interacts with  
333 immature NPCs preceding incorporation of the cytoplasmic export platform and its depletion leads to  
334 the formation of NE herniations with a continuous ONM, suggesting that Brl1 may act prior to INM-  
335 ONM fusion during NPC maturation. We therefore wanted to mechanistically understand how Brl1  
336 promotes NPC biogenesis. Brl1 is composed of a long unstructured N-terminus and two transmembrane  
337 domains linked by a luminal domain, which contains four cysteines that form two disulfide bridges  
338 (Figure 5A, 5C and S4D - G) (Zhang et al. 2018). Such a structural organization was also predicted by  
339 AlphaFold (Figure 5A and Figure S4) (Jumper et al. 2021). The structured part of Brl1 containing the  
340 transmembrane and luminal region were predicted with high confidence scores and agree well with  
341 previous experimental findings (Saitoh et al. 2005; Zhang et al. 2018). The N- and C-terminus on the  
342 other hand had poor prediction scores, as expected for natively disordered regions (Figure S4A-C).  
343 Closer inspection of the predicted Brl1 structure revealed an amphipathic helix (AH) just upstream of  
344 the second transmembrane domain (Figure 5A-C), that was also suggested by the amphipathic helix  
345 prediction algorithm HeliQuest (Gautier et al. 2008) (Figure 5C).

346 Amphipathic helices are short motifs capable of binding lipid bilayers and they have been implicated  
347 in bending membranes by inserting into one leaflet of a bilayer, generating a convex curvature (Ford et  
348 al. 2002; Wang et al. 2016). Interestingly, AHs are structural features of many membrane-binding NUPs  
349 (Hamed and Antonin 2021) and likely target NUPs to the NPC by curvature sensing (Floch et al. 2015).  
350 The amphipathic helix in Brl1 (ahBrl1) is highly conserved between organisms with closed mitosis  
351 (Figure 5C), suggesting that it could play a critical role in NPC biogenesis, for example by mediating  
352 the INM-ONM fusion. Indeed, in tetrad dissections of heterozygous yeast strains carrying a mutant  
353 allele of *BRL1* either lacking the AH (*brl1 $\Delta$ ah*) or disrupting the AH (*brl1(I395D)*), only the two spores  
354 that carried the wild-type allele were viable (Figure 5D). This shows that ahBrl1 is essential for the  
355 function of Brl1 and cell viability.

356 We hypothesized that ahBrl1 might contribute to the INM-ONM fusion step in NPC biogenesis through  
357 interaction with membranes. We therefore tested the membrane binding capacity of ahBrl1 *in vitro*  
358 using a liposome floatation assay, where we incubated liposomes generated from *E. coli* polar lipid  
359 extract with a recombinant MBP-ahBrl1-yEGFP fusion protein (Figure 5E). We observed that MBP-  
360 ahBrl1-yEGFP was enriched in the floating fraction, whereas fusion proteins that carry single point  
361 mutations disrupting the hydrophobic face of ahBrl1 (F391D and I395D) displayed strongly reduced  
362 liposome binding compared to the negative control MBP-TEV-yEGFP (Figure 5E). Interestingly, we  
363 observed that an ahBrl1-yEGFP fusion protein expressed in yeast cells was enriched at the NE *in vivo*  
364 (Figure 5F). Together, these results demonstrate that ahBrl1 can bind to lipid membranes *in vitro* and  
365 *in vivo* and is essential for cell viability.

366  
367

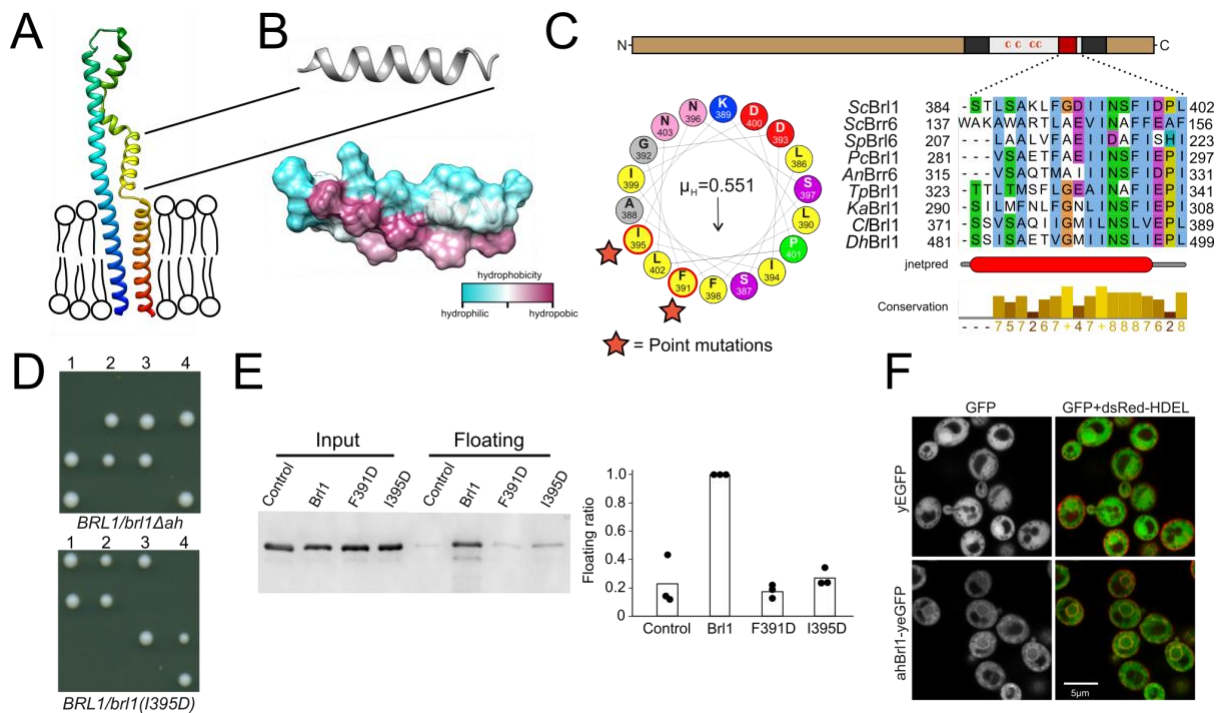

368

369 **Figure 5: A conserved luminal amphipathic helix binds to membranes and is essential for Brl1 function. A)**

370 AlphaFold prediction for Brl1 (Jumper et al. 2021). Unstructured termini are not shown; blue: N-terminus, red:

371 C-terminus. Transmembrane domain highlighted by the lipid bilayer. **B)** Predicted amphipathic helix in ribbon

372 and surface representation, colored based on hydrophobicity. **C)** Upper panel: Domain architecture of Brl1:

373 extraluminal N- and C-terminus in brown, transmembrane domains in dark gray, amphipathic helix in red; Left

374 panel: Helical wheel representation of the amphipathic helix of Brl1 and the hydrophobic moment determined

375 with HeliQuest (Gautier et al. 2008). Point mutants are indicated by stars. Right panel: Conservation and

376 secondary structure prediction of the amphipathic helix in different fungi. Hydrophobic: blue, negative: magenta,

377 polar: green, glycine: orange, proline: yellow, unconserved: white. Jnetpred4 secondary structure prediction

378 (Drozdetskiy et al. 2015): helices are marked as red tubes. *Sc*: *Saccharomyces cerevisiae*, *Sp*:

379 *Schizosaccharomyces pombe*, *Pc*: *Pneumocystis carinii*, *An*: *Aspergillus nidulans*, *Tp*: *Tetrapisispora phaffii*, *Ka*:

380 *Kazachstania Africana*, *Cl*: *Clavispora lusitaniae*, *Dh*: *Debaryomyces hansenii*. **D)** Vertically oriented tetrad

381 offspring of heterozygous Brl1 mutants carrying one allele lacking the amphipathic helix (*brl1Δah*) or a single

382 point mutation in the hydrophobic side of the helix (*brl1(I395D)*). **E)** Membrane floatation assay with purified

383 MBP-ahBrl1(377-406)-yEGFP fusion proteins and liposomes made of *E. coli* polar lipids extract. Control: MBP-

384 GFP. Mean of three biological replicates, individual data points are indicated. **F)** Coexpression of yEGFP or

385 ahBrl1-yEGFP from the GAL1 promoter with the ER/NE marker dsRed-HDEL.



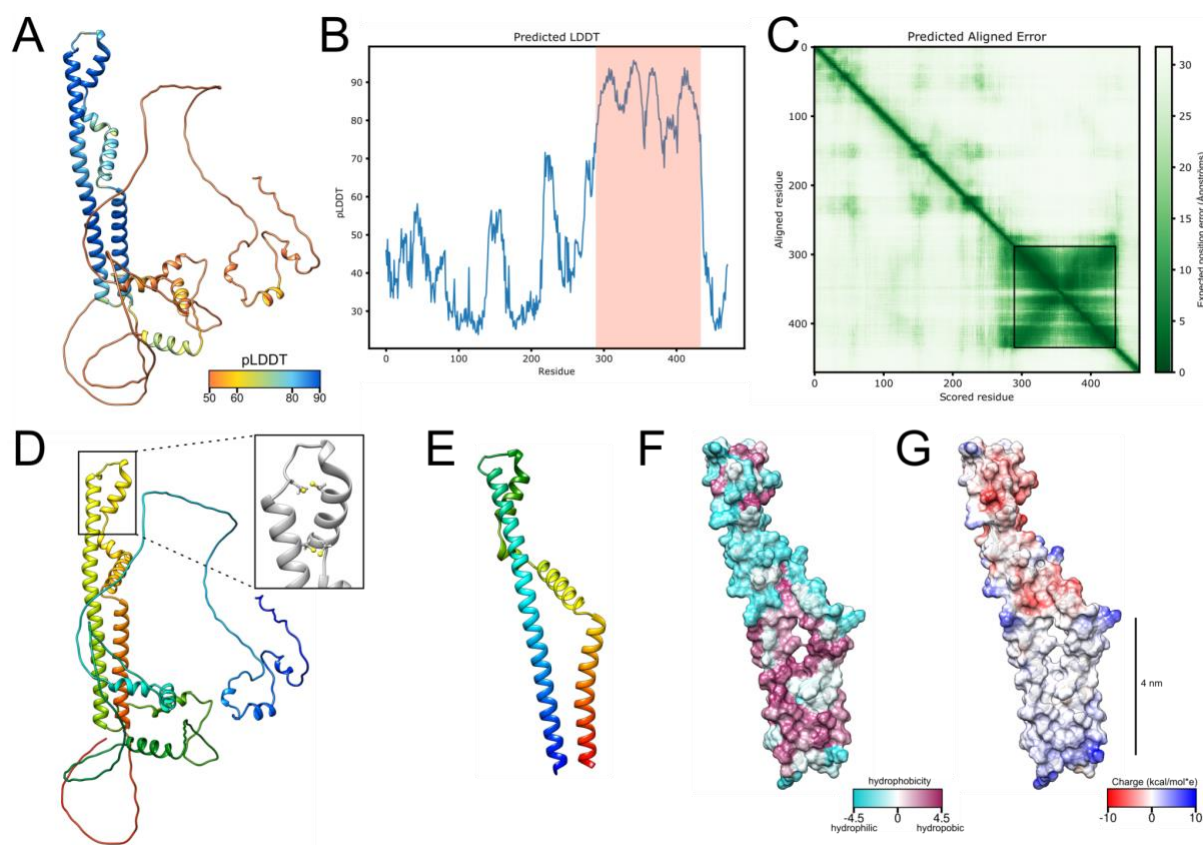

386

387 **Figure S4: AlphaFold structure prediction for Br11** A) Predicted structure for full-length Br11 using  
388 AlphaFold2, colored based on the predicted local distance difference test score (pLDDT). B) pLDDT score for  
389 Br11. High confidence region shown in Figure S4E-G and Figure 5A indicated by red frame. C) Predicted aligned  
390 error for Br11, dark green area indicates high inter-domain accuracy. High accuracy region shown in Figure S4E-  
391 G and Figure 5 is highlighted by the black frame. D) Predicted structure for Br11, colored in rainbow (red: C-  
392 terminus, blue: N-terminus), inset shows the position of the 4 cysteines in the luminal domain of Br11. E) Predicted  
393 structure for high confidence region Br11(289-434) in rainbow coloring (red: C-terminus, blue: N-terminus). F-  
394 G) Surface representation of Br11(289-434), colored by hydrophobicity (Kyte-Doolittle scale) S4F and charge  
395 S4G.

## 396 **Overexpression of Brl1(I395D) blocks NPC maturation and leads to herniating INM** 397 **sheets at NPC assembly sites**

398 Since ahBrl1 is required for Brl1's function we wanted to elucidate its role during NPC assembly.  
399 Previously, it was reported that overexpression of Brl1 bypasses the requirements for Nup116 and Gle2  
400 in NPC biogenesis (Liu et al. 2015; Zhang et al. 2018). We screened the effect of six single point  
401 mutations in ahBrl1 for the ability to rescue growth of the *nup116ΔGLFG P<sub>MET3</sub>-NUP188* strain (Figure  
402 S5A). We observed that overexpression of Brl1 mutants, replacing the hydrophobic residues F391,  
403 I395, F398 or L402 by the charged aspartic acid not only failed to rescue the assembly defect but had a  
404 dominant negative effect on cell growth (Figure 6A and S5A). When residues at the polar side of the  
405 helix (D393 and D400) were substituted to alanine, functionality was not perturbed (Figure S5A). The  
406 dominant negative growth inhibition persisted in the wild-type background (Figure 6A), demonstrating  
407 that overexpression of Brl1 with an impaired AH alone is toxic.

408 To understand the causes of the dominant negative effect of ahBrl1 mutant overexpression, we  
409 examined the localization of yEGFP-fused Brl1, Brl1Δah and Brl1(I395D) expressed under a galactose-  
410 inducible promoter (Figure 6B). Brl1Δah and Brl1(I395D) initially localized to the NE-ER network,  
411 occasionally forming bright foci at the NE. However, after six hours of expression most of the protein  
412 was localized in large NE accumulations (Figure 6B). In contrast, overexpression of Brl1 with an  
413 unperturbed AH uniformly localized to the NE and the ER (Figure 6B), as also shown previously (Saitoh  
414 et al. 2005; Zhang et al. 2018). Since wild-type Brl1 is unable to fulfill its function upon overexpression  
415 of the ahBrl1 mutants, we also wanted to analyze the localization of the endogenous copy of Brl1 in  
416 these conditions. Interestingly, we found that yEGFP-tagged Brl1 colocalized with the large Brl1I395D-  
417 mCherry puncta at the NE (Figure S5B). This suggests that a sequestration of endogenous Brl1 to these  
418 accumulations could potentially lead to the dominant negative effect of the ahBrl1 mutants and that a  
419 critical concentration of Brl1 with a functional AH is needed for successful membrane fusion at NPC-  
420 assembly sites. The dominant negative growth defect of overexpressed ahBrl1 mutants could thus be  
421 caused by the formation of toxic assemblies, which also trap the endogenous Brl1 protein.

422 To test whether Brl1(I395D) can dynamically exchange between NE accumulations or is trapped there,  
423 we probed the dynamics of Brl1(I395D)-mCherry at the herniations with Fluorescence Recovery After  
424 Photobleaching (FRAP) (Figure 6C). We co-expressed either Brl1-mCherry or Brl1(I395D)-mCherry  
425 with Sec61-yEGFP, a transmembrane protein, that can freely diffuse between the ER/ONM and the  
426 INM (Deng and Hochstrasser 2006; Popken et al. 2015). We compared the fluorescence recovery of  
427 Brl1-mCherry with Sec61-yEGFP in an arbitrary NE region and saw that both proteins fully recover  
428 with a comparable half-life ( $\tau_{1/2}$ ) of ~2 seconds, indicating that they freely diffuse in the membrane of  
429 the NE (Figure 6C). This is in line with our lysis intermixing experiments, where we saw that Brl1  
430 dynamically interacts with the NPC (Supplementary Results Section “*Lysis intermixing assay*” and

431 Supplementary Results Figure 1B-D). Next, we photobleached the fluorescent signal of Brl1(I395D)-  
 432 mCherry and Sec61-yEGFP in the NE-attached foci and observed that Brl1(I395D)-mCherry has a high  
 433 immobile fraction that is not replaced over the time scale of 25 seconds, while Sec61-yEGFP almost  
 434 fully recovered (Figure 6C). The  $\tau_{1/2}$  of recovery of the mobile fraction of Brl1(I395D)-mCherry is  
 435 comparable to Brl1-mCherry. These data suggest that passage of Brl1(I395D)-mCherry through the NPC  
 436 intermediate structure is an irreversible process, and once Brl1(I395D)-mCherry reaches the herniations  
 437 it likely multimerizes and is trapped.  
 438 We next wanted to test if the NE accumulations of Brl1(I395D)-mCherry also trap NPC components.  
 439 To this end, we analyzed the colocalization of Brl1(I395D)-mCherry with several yEGFP-tagged Nups:  
 440 Nup116, Nup133 and Nup170 display regular NE localization and importantly, can be detected in the  
 441 NE-regions corresponding to the Brl1(I395D)-mCherry foci (Figure 6D). In contrast, Nup82 is entirely  
 442 absent from NE-areas with Brl1(I395D)-mCherry puncta. This labeling pattern is consistent with the  
 443 one observed in the NPC herniations that form upon Brl1 depletion (Figure 3 and 4) suggesting that  
 444 overexpressed Brl1(I395D) concentrates adjacent to NPC assembly intermediates composed of the IR  
 445 and Y-complex but not the cytoplasmic NUPs.

446  
 447

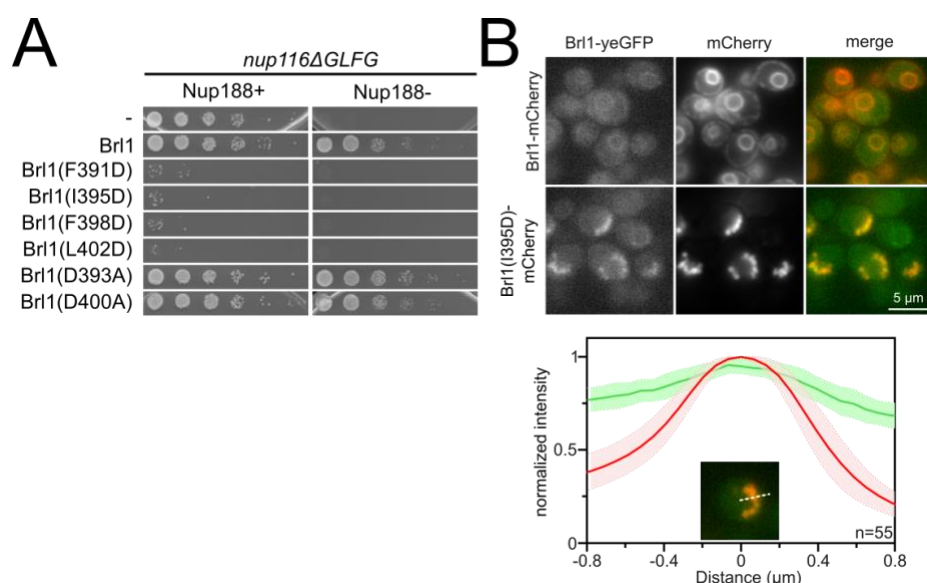

448  
 449

450 **Figure S5: Luminal AH of Brl1 is involved in NPC biogenesis.** **A)** Spotting assay of five-fold serial dilutions  
 451 of *nup116ΔGLFG PMET3-NUP188* cells expressing various ahBrl1 domain mutants from the GAL1 promoter.  
 452 **B)** Co-localization of mCherry tagged Brl1 or Brl1(I395D) expressed from a galactose-inducible promoter with  
 453 endogenously tagged Brl1-yEGFP. Lower panel: Maximum intensity plots of Brl1 (green line) relative to  
 454 maximum Brl1(I395D)-mCherry signal in NE foci (red line) from nucleoplasm (left) to cytoplasm (right).

455 Average and standard deviation for 55 line-plots, every point is an average of  $n > 30$  values. A representative image  
 456 used for analysis is shown in inset.  
 457

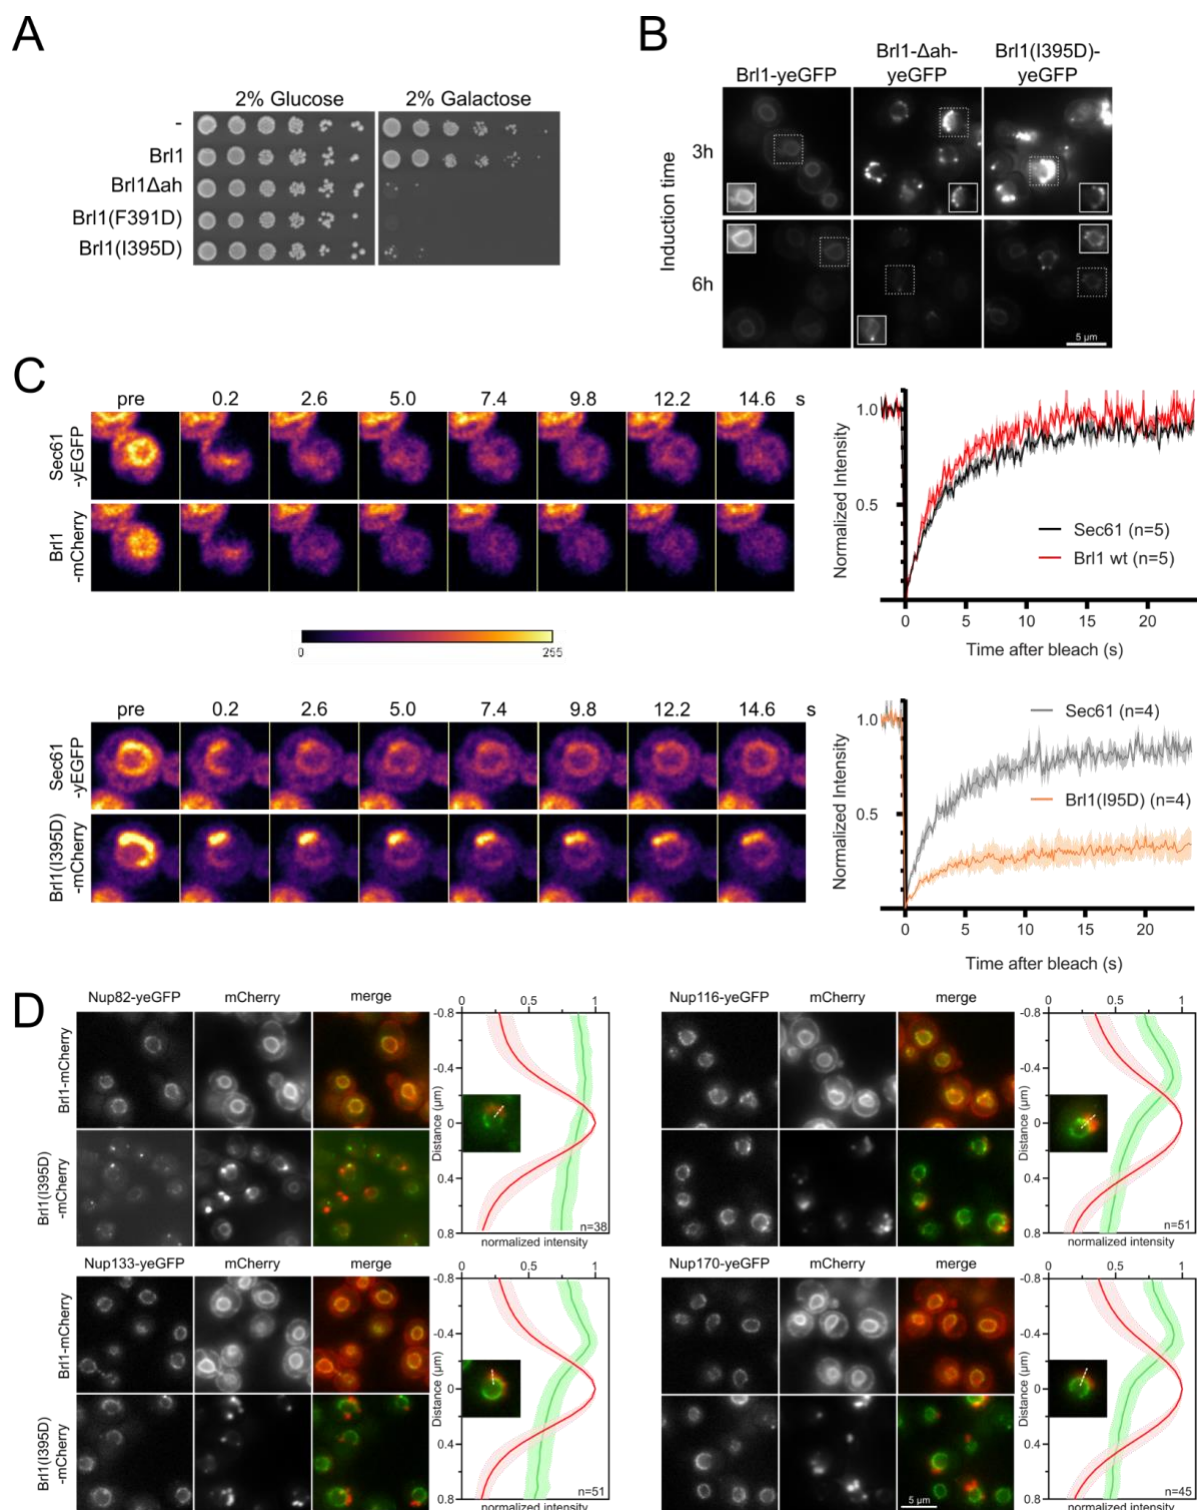

458 **Figure 6: Overexpression of Brl1(I395D) with an impaired amphipathic helix interferes with NPC**  
 459 **assembly.** **A**) Spotting assay of wild-type cells expressing Brl1, Brl1Δah or Brl1(I395D) from the GAL1 promoter  
 460 in glucose or galactose containing medium. **B**) Localization of yEGFP-tagged Brl1, Brl1Δah or Brl1(I395D) from  
 461

462 the GAL1 promoter in SD 2% galactose. Brightness contrast settings of nuclei in insets are adjusted differently.  
463 C) Fluorescence Recovery After Photobleaching of Sec61-yEGFP, Brl1-mCherry and Brl1(I395D)-mCherry. Left  
464 panels: representative images of recovery, right: corresponding averaged recovery curves( $n>4$ ). One  
465 representative experiment of three biological replicates is shown. Images are shown in pseudocolor. D) Co-  
466 localization of mCherry tagged Brl1 or Brl1(I395D) and yEGFP-tagged NUPs: mCherry channel is scaled  
467 differently between images. Maximum intensity plots of NUPs (green lines) relative to maximum Brl1(I395D)-  
468 mCherry signal in NE foci (red line) from cytoplasm (bottom) to nucleoplasm (top). Average and standard  
469 deviation of more than 38 line-plots with  $n>31$  values averaged for each point. A representative image used for  
470 the analysis is shown for each condition in inset.

471

472 To gain ultrastructural insights into the organization of the Brl1(I395D) accumulations, we investigated  
473 cells using cryo-ET on FIB-milled lamella (Figure 7A-7C, Movies S5 and S6). We observed mature  
474 NPCs, INM evaginations and NE herniations as already seen in Brl1-depleted cells (Figure 7A panel i-  
475 iii, Figure 7B and Movie S5). No herniations could be observed in control cells (Figure 7B, movies S7  
476 and S8). To our surprise upon Brl1(I395D) overexpression, we also found large multi-layered  
477 herniations with diameters up to ~600 nm, so far not reported in any other NPC assembly mutant (Figure  
478 7A panel iv-vi, Movie S5 and S6). These onion-like structures are composed of elongated INM  
479 herniations curling over each other with up to four stacked double bilayers. Of note, inter-membrane  
480 distances were remarkably constant with two discrete widths of the innermost sheets, suggesting two  
481 different maturation modes for the onion-like herniations (Supplementary results: “*Model for the*  
482 *development of “onion-like” herniations*”). Unlike the herniations in Brl1-depleted cells (Figure 2A),  
483 these structures were not filled with electron-dense material and only occasionally enclosed small  
484 patches of aggregate-like densities (Figure 7A panel v-vi, movies S5 & S6). Single subtomograms and  
485 the subtomogram average of 47 herniations confirm the presence of an NPC intermediate with a  
486 diameter of 97 nm at the bases of these herniations (Figure 7C). Densities which likely correspond to  
487 the IR and the nucleoplasmic Y-complex ring but not the cytoplasmic side of the NPC can be  
488 distinguished. Although our average did not allow for unambiguous assignment or structure fitting,  
489 these densities look similar to the structures we observed in herniations of Brl1-depleted cells (Fig S2D  
490 ii) and the previously reported herniation structure in *nup116Δ* cells at 37°C (Allegretti et al. 2020), and  
491 are in a good agreement with the NUP localization patterns observed by fluorescence microscopy  
492 (Figure 3C-3F).

493 Altogether, these results demonstrate the critical role of Brl1’s AH during NPC maturation. The fact  
494 that the essential luminal ahBrl1 has a propensity to bind membranes, and the observation that Brl1 acts  
495 prior to INM-ONM fusion suggests that Brl1 acts as a fusogen with membrane deforming properties.  
496 By deforming the INM, Brl1 could assist in the last NPC maturation step: the formation of a nucleo-  
497 cytoplasmic transport channel.

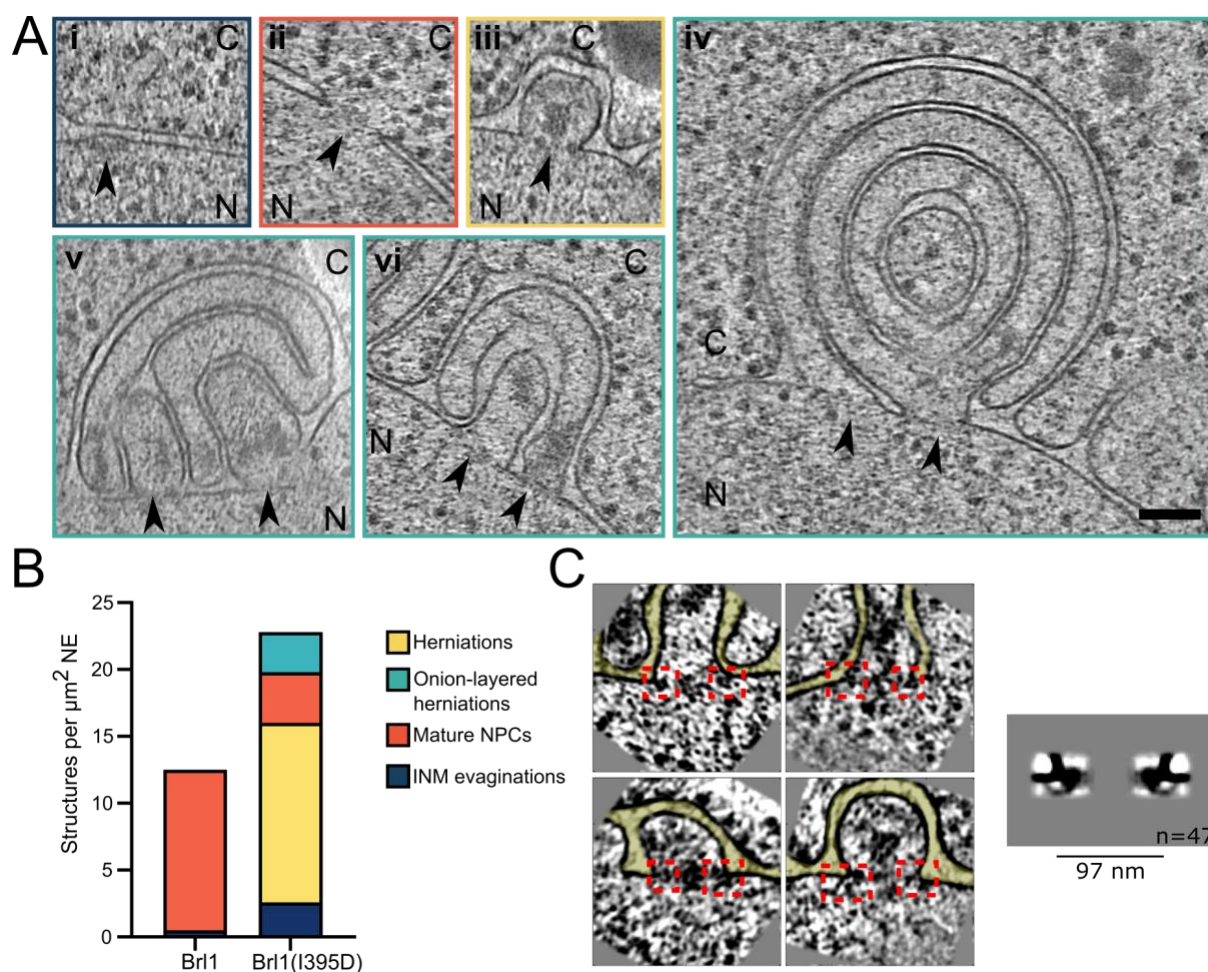

498

499 **Figure 7: Br11(I395D) overexpression leads to the formation of multi-layered NE herniations. A)**

500 Tomographic slices of the NPC-like structures quantified in 7B, observed in FIB-milled cells overexpressing

501 Br11(I395D), scale bar: 100 nm, N: nucleus, C: cytoplasm, slice thickness: 2.1 nm, arrows indicate NPC-like

502 structures. Image frames colored according to the color code used in 7B. Panels iv and vi are tomographic slices

503 from the tomogram in movie S5. **B)** Quantification of observed structures in Br11(I395D) cells and control

504 condition; 17 ( $5.1 \mu\text{m}^2$  NE) and 50 ( $9.8 \mu\text{m}^2$  NE) tomograms were quantified for cells overexpressing Br11 or

505 Br11(I395D) respectively. **C)** Single subtomograms and subtomogram average of 47 herniations in Br11(I395D)

506 overexpressing cells; box size of subtomograms is 270 nm; cytoplasm is at the top in each image.

## 507 **Discussion**

508 The NPC is one of the largest cellular protein complexes, yet only few non-NPC proteins have been  
509 suggested to aid with its biogenesis. One such factor is the integral membrane protein Br11. However,  
510 the timing of Br11-function in the NPC assembly process or mechanistic details of its action have  
511 remained elusive. In this study, we show that Br11 is essential for NPC biogenesis, and we provide  
512 functional insight into its role in membrane fusion.

513 Based on its binding capacity to structural NUPs, it was previously proposed that Br11 associates with  
514 NPC maturation intermediates (Zhang et al. 2018). Using our recently developed KARMA method  
515 (Onischenko et al. 2020), we now demonstrate that Br11 indeed preferentially interacts with newly  
516 synthesized NUPs and in addition, we found that Br11 primarily co-localizes with newly produced  
517 nucleoporin assemblies in cells (Figure 1D-1F). Furthermore, functional inactivation of Br11 stalls NPC  
518 assembly without affecting previously assembled NPCs (Figure 3E-3F). This leads to the accumulation  
519 of NE herniations that have a continuous ONM and contain incompletely assembled NPCs lacking the  
520 cytoplasmic export platform (Figure 3-4 and S2). Thus, our results clearly identify Br11 as an NPC  
521 assembly factor.

522 Depletion of Br11 leads to the formation of incomplete NPC structures that contain the IR, membrane  
523 ring, Y-complex and nuclear basket NUPs. The cytoplasmic Nup159 and Nup82 are absent from the  
524 intermediates but instead are mislocalized in cytoplasmic foci, as seen previously in other NPC-  
525 assembly mutants (Hodge et al. 2010; Makio et al. 2009; Onischenko et al. 2009, 2017; Scarcelli et al.  
526 2007) (Figure 3C-3D). In light of the observed NE herniations in Br11-depleted cells (Figure 3A-B and  
527 S2E), the fusion of the INM and ONM appear to be a prerequisite for the recruitment of the cytoplasmic  
528 Nup159-Nup82-Nsp1 complex. Thus, our data support an inside-out mode of interphase NPC assembly,  
529 similar to previously proposed models in yeast and mammalian cells (Onischenko et al. 2020; Otsuka  
530 et al. 2016; Thaller and Patrick Lusk 2018). Interestingly, in Br11-depleted cells the Y-complex NUPs  
531 display a reduced NE fluorescence signal and slow fractional labeling in our proteomic assays (Figure  
532 3C-D and 4C-D). This suggests that only the nucleoplasmic Y-complex ring is present in the  
533 intermediates. This is also in line with our cryo-EM data (Figure S2E) and with previous results in  
534 *nup116Δ* cells (Allegretti et al. 2020) suggesting that INM-ONM fusion is needed before the  
535 cytoplasmic Y-ring can be recruited to the assembling NPC.

536 We also observed that halted NPC assemblies accumulating upon Br11 depletion contain Mlp1 (Figure  
537 3C-F and 4C-D). In native NPC biogenesis, the nuclear basket NUPs and especially Mlp1 join very late  
538 (Onischenko et al. 2020). Interestingly, the slow metabolic labeling of Mlp1 in Br11 depleted cells  
539 shows that it still assembles late, however, unlike the cytoplasmic export platform NUPs, Mlp1 is not  
540 blocked from incorporation. This indicates that Mlp1 is recruited independently from Br11 in a  
541 kinetically slow process but likely does not depend on membrane fusion. Consistent with this, it is

542 possible to reconstitute a nuclear basket scaffold that contains Nup60, Nup2 and Mlp1 in absence of  
543 any other NUPs *in vitro* (Cibulka et al. 2022). This highlights that NPC biogenesis is likely not a strictly  
544 hierarchical process.

545 The fusion of INM and ONM is a crucial step during *de novo* NPC assembly in interphase. Membrane  
546 fusion does not occur spontaneously, and based on previously characterized membrane fusion events,  
547 it is likely that two NE lipid bilayers must be brought into proximity to initiate the fusion of the  
548 membranes (Peeters, Piët, and Fornerod 2022). While the fusion event itself is expected to be fast and  
549 thus difficult to investigate, potential assembly-intermediate states in which INM and ONM approach  
550 each other but are not yet fused, can be observed in cells with NPC-assembly defects (Makio et al. 2009;  
551 Thaller and Patrick Lusk 2018) and rarely also in normal cells (Otsuka et al. (Otsuka et al. 2016) and  
552 our cryo-ET data (Movie S3, figure 3B and 7B)). It has been suggested that NUPs and other proteins  
553 containing amphipathic helices are important players in the formation and stabilization of these early  
554 NPC-intermediates since they can bind to and deform membranes (Dawson et al. 2009; Jakub et al.  
555 2022; Schooley et al. 2012; Voeltz et al. 2006; Wang et al. 2021). In this study, we identified a  
556 membrane-binding amphipathic helix (AH) within the luminal domain of Br11 which is essential for its  
557 function in NPC assembly, as genetic perturbations that abolish membrane binding lead to severely  
558 impaired NPC biogenesis. Interestingly, this AH is highly conserved in organisms with closed mitosis  
559 and is a shared feature of proteins associated with NPC assembly such as Brr6, Apq12 and ER-bending  
560 reticulons (Dawson et al. 2009; Zhang et al. 2021). Taken together, these results emphasize the  
561 emerging role of AH motifs in NPC assembly.

562 Brr6 is a paralogue of Br11 with the same topology and orientation in the NE. Interestingly, Brr6 also  
563 contains a predicted luminal amphipathic helix, indicating that both proteins might function similarly.  
564 Further, it has been shown that Brr6 co-localizes at Br11-foci at the NE and physically interacts with  
565 Br11 (Lone et al. 2015; Saitoh et al. 2005; Zhang et al. 2018). However, deletion of Br11 or Brr6 cannot  
566 be rescued by overexpression of the respective paralogue and several NPC-assembly mutants such as  
567 *gle2Δ*, *nup116Δ* and *nup116ΔGLFG P<sub>MET3</sub>NUP188* can only be rescued by Br11-overexpression. This  
568 demonstrates that despite similar sequence (44% sequence similarity of the structured parts) and  
569 structure, Br11 and Brr6 do not act redundantly in NPC assembly. This is also in agreement with the  
570 differential localization of these two proteins: Br11 mainly localizes to the INM whereas Brr6 can be  
571 found in both NE leaflets (Zhang et al. 2018). Thus, it seems likely that Br11 and Brr6 act in concert  
572 during NPC-assembly and membrane fusion, however, the detailed function of Brr6 and the role of  
573 additional NUPs and potential assembly factors like Apq12 remains unclear and awaits further  
574 characterization.

575 How does Br11 promote interphase NPC assembly? Our observations that NPC-assembly intermediates  
576 that form in the absence of Br11 already contain membrane-binding NUPs (Figure 4D) suggest that they  
577 play a key role in deforming the INM, leading to INM-evaginations (Figure 8A-C left). We propose



578 that Brl1 is recruited to and concentrated at these NPC-assembly sites (Figure 8A). This view is  
579 supported by the punctate localization pattern of endogenously tagged Brl1-yEGFP (Lone et al. 2015),  
580 co-localization of Brl1-puncta with newly synthesized NUPs (Figure 1E) and accumulation of  
581 dysfunctional Brl1 mutants at stalled NPC assembly sites (Figure 6B, 6D and figure 7). The mechanisms  
582 by which Brl1 is recruited and to concentrated at assembly sites is not clear but could be achieved by  
583 the unstructured N-terminus of Brl1 or alternatively via the localization preference of Brl1 to the curved  
584 membranes of INM evaginations. The former possibility is supported by the non-punctate localization  
585 of Brr6 which contains only a short N-terminus (Lone et al. 2015). Irrespective, it seems likely that a  
586 high local concentration of Brl1 is critical for membrane fusion as overexpression of Brl1 can rescue  
587 assembly defects in multiple NUP mutants (Liu et al. 2015; Zhang et al. 2018).

588 Our results show that ahBr11 is required for the INM-ONM fusion event since cells that express Brl1  
589 with an impaired AH are not viable and overexpression of Brl1(I395D) inhibits NPC biogenesis leading  
590 to the formation of NPC-assemblies with multi-layered INM herniations (Figure 7A). Brl1(I395D)  
591 accumulates and multimerizes in these structures as shown by the high concentration and slow mobility  
592 in herniations (Figure 6B and 6C). Since overexpressed Brl1(I395D) strongly accumulates at the  
593 assembly sites and induces the formation of highly curved onion-like membrane sheets, we speculate  
594 that in the absence of a functional AH, Brl1 can still mediate membrane remodeling but not INM and  
595 ONM fusion. This points to an important role of ahBr11 in the membrane fusion event (Figure 8C) but  
596 how could Brl1 and its AH mediate the fusion of the INM and ONM? Interestingly, the predicted  
597 structure of Brl1 reveals the presence of a luminal, ~8nm long continuous alpha-helix (Figure 5A) that  
598 is stabilized by disulfide bridges (Figure S4D) (Zhang et al. 2018). Whereas this helix is too short to  
599 span the entire ~21 nm of the NE lumen (Supplementary results figure 2B), it is conceivable that at  
600 INM-herniations, where the two leaflets approach each other, this helix could interact with proteins in  
601 the ONM (Figure 8D). Intriguingly, a similar, long helix is also predicted in Brr6. It is tempting to  
602 speculate that Brl1 at the INM interacts with Brr6 at the ONM at early NPC assembly sites and that this  
603 interaction leads to INM-ONM fusion mediated by the conserved AHs present in both proteins. This  
604 possibility is supported by the differential localization patterns of Brl1 and Brr6 in immunogold labeling  
605 assays wherein Brl1 predominantly localizes at the INM while Brr6 is equally distributed between INM  
606 and ONM (Zhang et al. 2018).

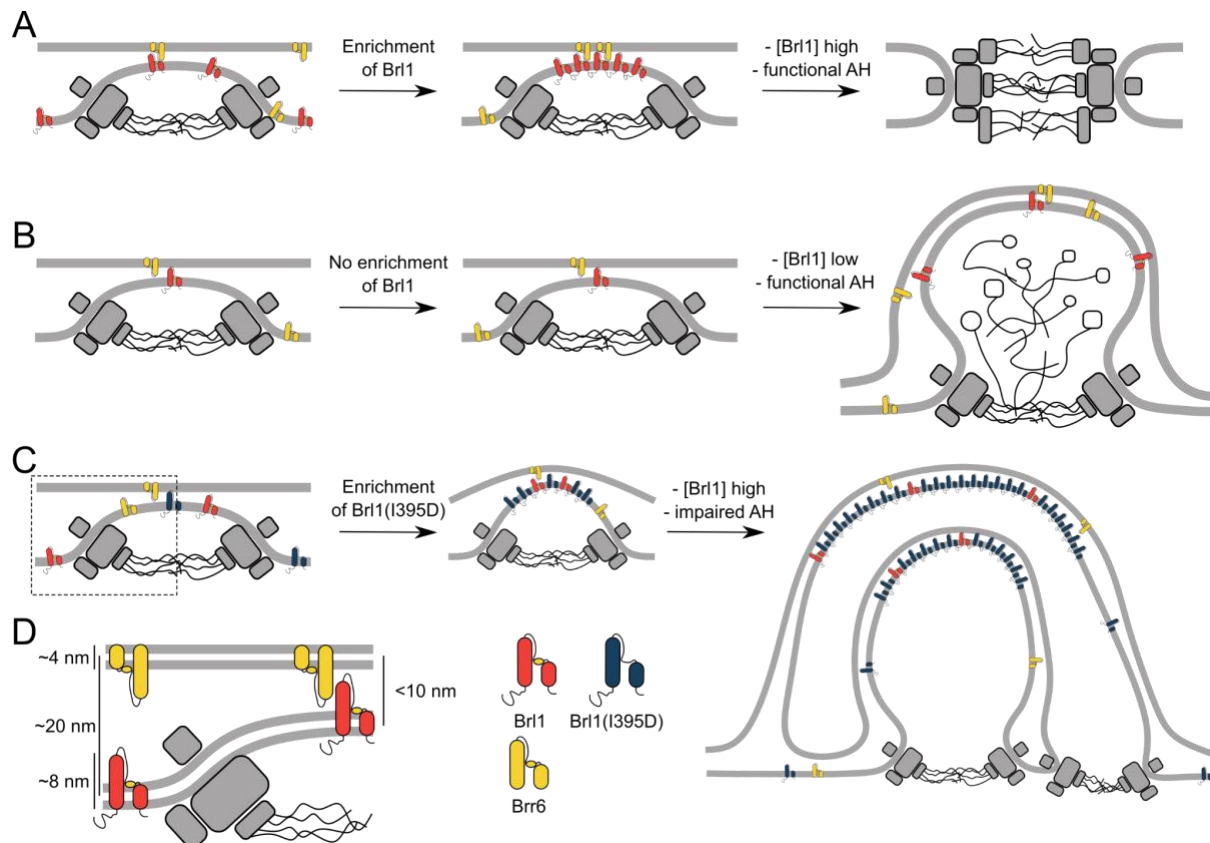

607

608 **Figure 8: The role of Br1 during NPC assembly.** A) Br1 (red) enriches on the inside of NPC maturation  
 609 intermediates and promotes INM-ONM fusion through the membrane-binding AH motif and likely in cooperation  
 610 with Brr6 (yellow). B) If Br1 cannot reach the critical concentration required to promote membrane fusion,  
 611 unresolved NE herniations, filled with electron dense material, appear. C) Overexpression of Br1(I395D) with a  
 612 perturbed AH (blue) concentrates at the NPC assembly site. It remodels the NE membranes and leads to expanded  
 613 multi-layered herniations but ultimately fails to induce membrane fusion. D) Br1 at the INM can only physically  
 614 interact with Brr6 or Br1 at the ONM when the NE leaflets approach, as it is the case at NPC-assembly sites.  
 615 Dimensions based on our cryo-ET data (Figure S2D), structure prediction (Figure S4) and measurements of the  
 616 NE (Supplementary results figure 2B).

617

618 Aside from the direct role in membrane fusion, Br1 might also affect the lipid composition of the NE.  
 619 Indeed, it has been proposed that Br1 forms a sensory complex with Brr6 and Apq12 that controls  
 620 membrane fluidity (Lone et al. 2015). During NE-fusion and other NPC-assembly steps, the membrane  
 621 curvature of the NE is extensively modulated and changes in lipid composition, either globally or locally  
 622 at NPC assembly sites, could facilitate this process. In fact, in Apq12 overexpressing cells, phosphatidic  
 623 acid (PA) accumulates at sites of ONM-overproliferation (Romanauska and Köhler 2018; Zhang et al.  
 624 2021). A similar PA accumulation was reported at *nup116Δ* herniations, indicating that PA might be a  
 625 relevant effector during NPC-assembly (Thaller et al. 2021). However, the effects of Br1, Brr6 and  
 626 Apq12 on lipid composition are somewhat controversial (Lone et al. 2015; Scarcelli et al. 2007; Zhang  
 627 et al. 2018) requiring better tools to understand the role of lipid environment in NPC biogenesis. Of

628 note, membrane proliferation or remodeling can also be induced by an overexpression of membrane  
629 proteins without necessarily altering the overall lipid composition. For example, overexpression of  
630 transmembrane proteins induces the formation of karmellae (Wright et al. 1988), expansions of the  
631 NE/ER membranes. Similarly, overexpression of AH-containing NUPs was shown to induce NE  
632 overproliferation resulting in multiple, stacked membrane cisternae (Marelli et al. 2001; Mészáros et al.  
633 2015) that were also observed upon overexpression of Brl1 or Brr6 (Zhang et al. 2018). Therefore, it is  
634 likely that NE-overproliferation also plays a role in the generation of the onion-like herniations that we  
635 observe in cells overexpressing the dominant-negative Brl1 variant, Brl(I395D). In the future, it will be  
636 important to manipulate NE lipids and to characterize the effects of membrane composition in NPC-  
637 assembly.

638

## 639 **Supplementary Results**

### 640 **Analysis of protein labeling in source lysate**

641 To ensure that the observed differences in labeling kinetics in the Br11 KARMA assay are not the result  
642 of differences in protein turnover, we assessed the labeling of several proteins in the source lysate of  
643 the APs by parallel reaction monitoring mass spectrometry (Peterson et al. 2012). As expected, both  
644 NTRs and two randomly picked abundant co-purified proteins showed essentially the same metabolic  
645 labeling in the source cell lysates and the corresponding APs (Supplementary results Figure 1A). NUPs  
646 from different assembly tiers did not show a systematic labeling difference in the source lysate, as was  
647 the case for the AP (Supplementary results Figure 1A). This shows that the kinetic differences are  
648 specific to the Br11 AP.

### 649 **Lysis intermixing assay**

650 A factor that could influence the labeling kinetics measured in KARMA assays is dynamic protein  
651 exchange during the AP procedure (Tackett et al. 2005). To test for the significance of this effect, we  
652 quantified the metabolic labeling in AP fractions of equal mixes of wild-type culture grown in heavy  
653 lysine medium and a Br11 affinity tagged strain grown in light lysine medium (Supplementary results  
654 figure S1B). Strikingly, we found that all NUPs readily intermix during the AP procedure to more than  
655 80% (Supplementary results figure S1C), values far higher than what we previously observed with a  
656 stably bound NUP bait (~20% with Mlp1) (Onischenko et al. 2020). Such a high extent of intermixing  
657 suggests that the Br11 association with NPCs is likely very dynamic. Interestingly, we also observed a  
658 pronounced negative correlation between NUP metabolic labeling in KARMA assays and the  
659 intermixing tests (Supplementary results Figure 1D), suggesting that Br11 binds young nucleoporin  
660 assemblies more stably.

### 661 **Kinetic state model**

662 The high labeling rates in KARMA assays with the Br11 bait (Figure 2B) and the *in vivo* fluorescence  
663 microscopy (Figure 1D-1E) both indicate that Br11 preferentially binds to young NPC assemblies. In  
664 the lysis intermixing tests we found that Br11 interacts with the NPCs highly dynamically  
665 (Supplementary results figure S2B-S2D) and likely also loosely binds to mature structures. Consistent  
666 with this, we still detect intermediate and late NUPs in Br11 AP fractions (Figure S1B). To assess the  
667 binding preference of Br11 during NPC assembly in a quantitative manner we made use of the three-  
668 step KSM that we have previously developed (Onischenko et al. 2020). Note, the KSM that was  
669 originally designed to account for completely inaccessible pools of mature NPCs (e.g., ones that are  
670 sequestered and cannot be pulled down), but in the context of Br11, these pools have a new meaning

671 reflecting the lower affinity of Brl1 to late complexes. Our KSM analysis revealed that a considerable  
 672 fraction of primarily early tier NUPs become inaccessible to Brl1 bait (Figure 2C). The smaller  
 673 inaccessible pools of late and intermediate NUPs indicate that a fraction of the Brl1 dissociates prior to  
 674 their assembly. By contrast, NUP baits almost never led to inaccessible pools, consistent with them  
 675 being constitutively bound and not leaving the NPC once assembled (Figure 2C).  
 676

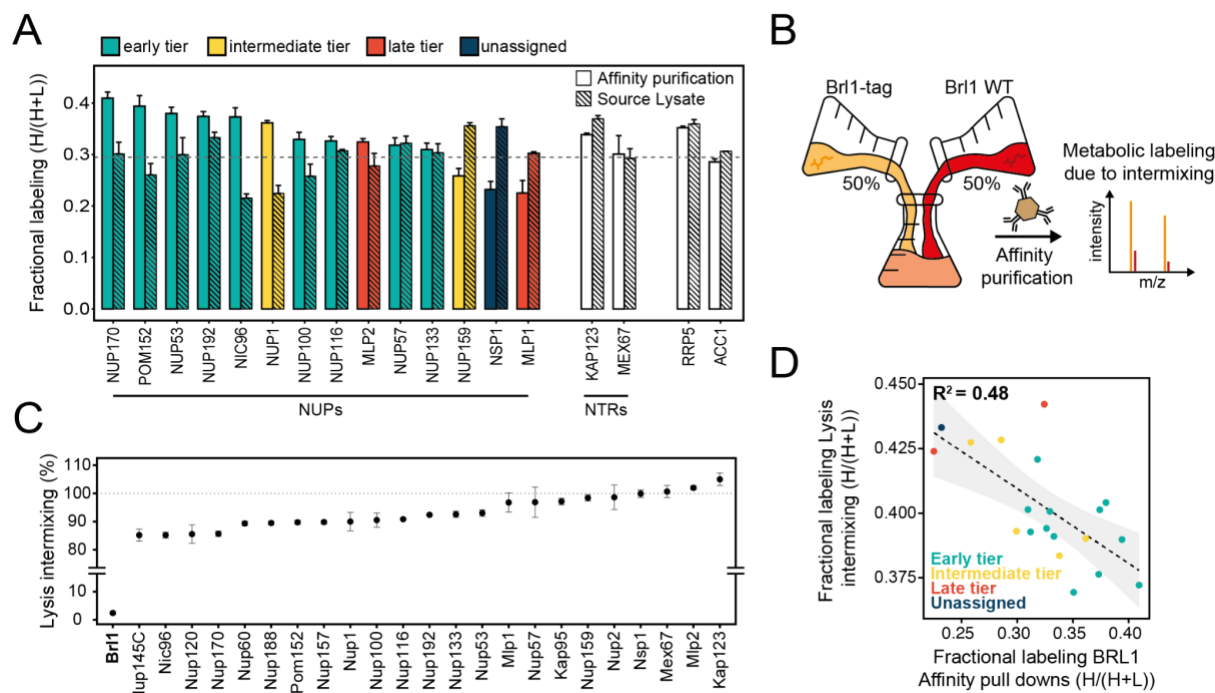

677  
 678 **Supplementary results figure 1: Control protein labeling in KARMA assays.** **A)** Fractional labeling of NUPs  
 679 and NTRs in KARMA assays with Brl1 bait and the respective source lysate, 90 min after labeling onset. Median  
 680  $\pm$  SD of three biological replicates. **B)** Experiment to test the intermixing dynamics. Equal fractions of an  
 681 unlabeled Brl1 affinity tagged strain and a wild-type culture grown in labeled medium were subjected to the  
 682 affinity purification procedure. **C)** Percentage of intermixing for NUPs and NTRs normalized to the mean of all  
 683 co-purified proteins. Median  $\pm$  SD of three biological replicates. **D)** Correlation of NUPs between fractional  
 684 labeling in the intermixing experiment and in KARMA assay with Brl1 bait. Coloring according to the assembly  
 685 tier. Median of three biological replicates each.

## 686 **Model for the development of “onion-like” herniations**

687 The large multi-layered “onion-like” herniations that form in response to Br11(I395D) overexpression,  
688 have not been reported before and the question arises of how these structures could assemble at the NE.  
689 Interestingly, we noticed a remarkably constant spacing between the two bilayers and the enclosed  
690 nuclear space. Morphometric analysis of the different lipid layers reveals that the middle sheets  
691 consisting of two INMs have a very regular spacing of ~13 nm (Supplementary results figure 2A-B).  
692 The intermembrane spacing in the outer layer consisting of INM and ONM is significantly wider (~19  
693 nm), which is very similar to the spacing of regular NE in our control condition (~21 nm). Interestingly,  
694 the innermost layers show a bimodal distribution with two peaks at heights of the INM-INM middle  
695 layers and the INM-ONM outer layers (Supplementary results figure 2A-B). This could be explained  
696 by two distinct maturation mechanisms of the onion-like structures. In maturation mode 1, an elongated  
697 herniation curls around a part of the cytoplasm and further grows until membrane fusion leads to the  
698 enclosure of cytoplasm in the very center of the herniation. Growth and fusion events of subsequent  
699 herniations then result in the multi-layered herniations (Supplementary results figure 2C). Consistent  
700 with this mechanism, we sometimes see ribosome-like densities in the center of the herniations  
701 (Supplementary results figure 2C, rightmost panel). In maturation mode 2, a herniation curls over  
702 another one, leading to an INM-INM inner bilayer. This is supported by the frequent observation of  
703 clustered herniations in which multiple INM sheets are enclosed by a single ONM (Supplementary  
704 results figure 2D).

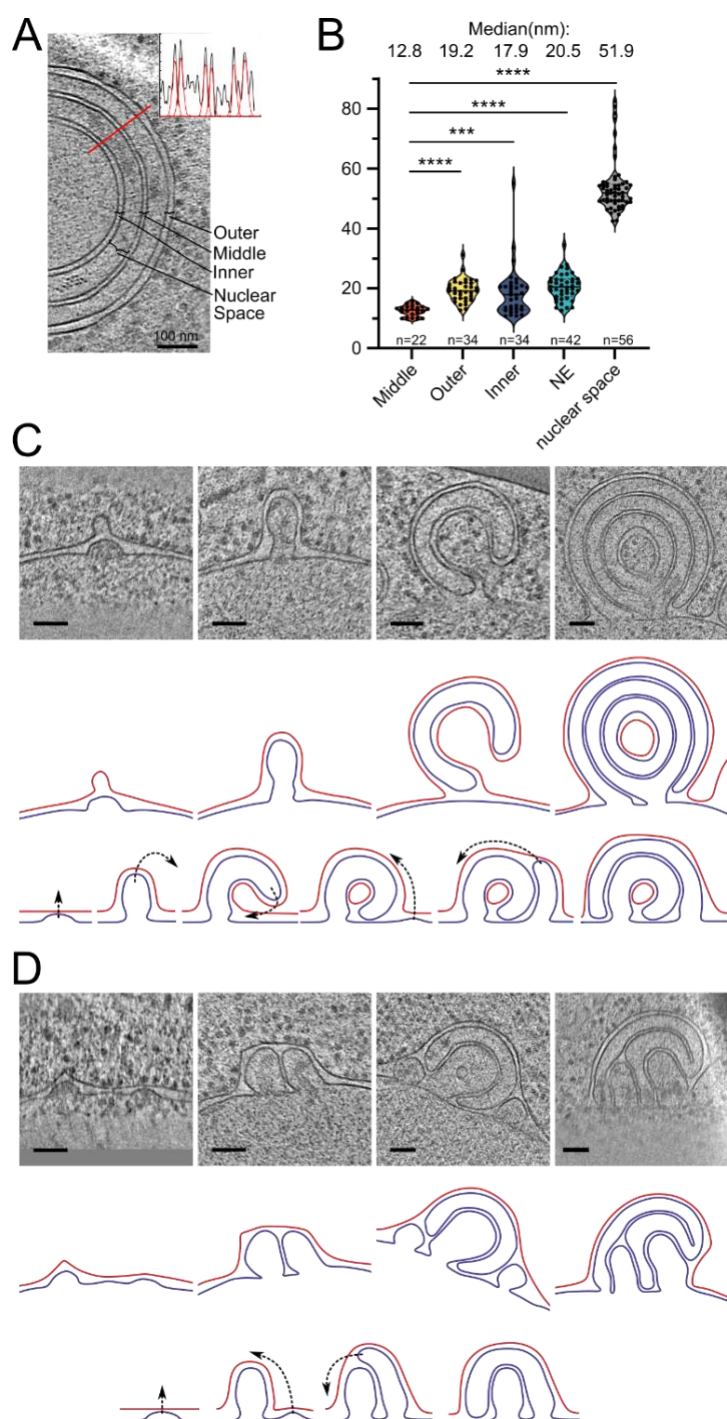

705  
 706 **Supplementary results figure 2: Potential maturation processes of onion-like herniations.** A) Tomographic  
 707 slice of an onion-like herniation and an example line plot with fitted Gaussians measured at the indicated red line.  
 708 Brackets indicate how the distances were classified for the plot in B). B) Violin plot with individual points of  
 709 membrane-membrane distances. Mann-Whitney test, \*\*\*\*: p-value <0.0001; \*\*\*: P-value = 0.0001 C) Mode 1  
 710 for maturation of onion-like herniations. Top panel: tomographic slices of several stages of herniations in  
 711 Br11(I395D) overexpressing cells (nucleus always in the bottom), middle panel: membrane segmentation of the  
 712 herniations of the upper panel. INM: blue, ONM: red; ONM in the center of the very right panel was classified as

713 ONM based on the presence of ribosomes and wider membrane spacing. Lower panel: schematic of how the  
714 onion-like herniations mature. **D)** Same as **C)** but for mode 2 of the maturation process of onion-like herniations.  
715 Scale Bar: 100 nm. Slice thickness: 1.4 nm.

## 716 **Acknowledgements**

717 We are grateful to all the Weis lab members for many fruitful discussions and helpful suggestions. A.K.  
718 would like to thank A. C. Meinema for valuable discussions on and help with image analyses. We thank  
719 P. Picotti and A. Leitner for the access to MS instruments, and the Center of Microscopy and Image  
720 Analysis (ZMB), University of Zürich, and ScopeM, ETH Zürich, for microscopy support. We would  
721 like to acknowledge the contributions of S. Steiger and J. Vailliant to early stages of this work during  
722 their student projects. A.K. was a recipient of a Swiss National Science Foundation Marie Heim-  
723 Voegtlin Fellowship (Grant number: PMPDP3\_171317) and A.A.A. acknowledges the support from an  
724 EMBO postdoctoral fellowship (Grant number: ALTF 910-2021). This study was supported by project  
725 grants from the Swiss National Science Foundation (31003A\_179275 to K.W and 31003A\_179418 to  
726 O.M.), a grant from the Research Council of Norway (NFR 315615 to E.O., K.W. and E.N.), and a  
727 grant from the German Research Foundation (DFG AN377/7-1 to W.A.)

## 728 **Competing interests**

729 The authors declare no conflict of interest.

## 730 **Supplementary material**

731 **Movie S1 and S2:** Sequential sections of a cryo-tomogram from Br11 depleted cells. The tomogram is  
732 6x binned; pixelsize: 2.1nm; scalebar: 100nm.

733 **Movie S3 and S4:** Sequential sections of a cryo-tomogram from non-depleted Br11 control cells. The  
734 tomogram is 6x binned; pixelsize: 2.1nm; scalebar: 100nm.

735 **Movie S5 and S6:** Sequential sections of a cryo-tomogram from Br11(I395D)-overexpressing cells. The  
736 tomogram is 6x binned; pixelsize: 2.1nm; scalebar: 100nm.

737 **Movie S7 and S8:** Sequential sections of a cryo-tomogram from Br11-overexpressing cells. The  
738 tomogram is 6x binned; pixelsize: 2.1nm; scalebar: 100nm.



## 739 **Data availability**

740 The representative tomograms shown in the movies S1-S8 will be deposited in the EMDB under the  
741 accession number EMD-14503, EMD-14505 and EMD-14506. All raw MS data, the spectral libraries,  
742 the DIA data extractions generated with Spectronaut and the R code used for analysis will be uploaded  
743 in the PRIDE repository under the accession numbers PXD032017, PXD032016, PXD032024 and  
744 PXD032034 (Table 1). The proteomic data generated here was compared to a previously published  
745 dataset (Onischenko et al. 2020) available on PRIDE (PXD018034). The source data for the figures are  
746 provided. All blots presented in this study are provided in an uncropped format. Structure predictions  
747 for Br11(P38770) and Brr6(P53062) can be accessed in the AlphaFold Protein Structure Database.

## 748 **Materials and methods**

### 749 **Plasmids and yeast strains construction**

750 Plasmids were generated according to standard molecular cloning techniques. The plasmids used in this  
751 study are listed in Supplementary File 1. Standard yeast genetic protocols were used for plasmid  
752 transformation and integration of linear DNA fragments into the yeast genome by homologous  
753 recombination. Strains used in this study are listed in Supplementary File 2. The heterozygous yeast  
754 strains *BRL1/brl1Δah* (lacking amino acids 376 - 402) and *BRL1/brl1(I395D)* were generated with  
755 CRISPR-Cas9 genome editing. Cloning details are available on request.

### 756 **Yeast culturing conditions**

757 Unless otherwise stated, yeast cultures were grown to mid log phase for at least 12 h at 30°C. For  
758 Western Blot analysis and fitness assays, cells were cultured in YPD medium (1% yeast extract, 2%  
759 peptone, 2% dextrose) and for microscopy and proteomic analyses in synthetic complete medium (SCD,  
760 6.7 g/L yeast nitrogen base without amino acids, 2% dextrose) supplemented with the necessary amino  
761 acids and nucleobases. Auxin-inducible degradation of Br11 in log-phase yeast cultures with  $OD_{600} =$   
762 0.1 - 0.2 was induced by addition of IP6 (4 μM phytic acid dipotassium salt, Sigma-Aldrich P5681) and  
763 either auxin (+auxin, 500 μM indole-3-acetic acid in ethanol, Sigma-Aldrich I2886) or the equivalent  
764 amount of ethanol (-auxin) for the solvent control. Strains with galactose-inducible Br11 constructs were  
765 pre-cultured in SC medium containing 2% raffinose. Expression was induced by supplementing 2%  
766 galactose to log-phase cultures  $OD_{600} = 0.1 - 0.2$ . For the metabolic labeling experiments, cells were  
767 initially grown in SCD containing light lysine (light SCD, 25 mg/L) and then pulse labeled by medium  
768 exchange to SCD containing 13C6, 15N2 l-lysine (heavy SCD, Cambridge Isotope Laboratories, 25  
769 mg/L).

## 770 **Western blotting**

771 Auxin-inducible degradation was performed as described above (Yeast culturing conditions). At each  
772 post-degradation time point, an amount of cells corresponding to 2 OD<sub>600</sub> was collected by  
773 centrifugation and lysed by a 15 min incubation in 0.1 M sodium hydroxide. Subsequently, cells were  
774 pelleted, resuspended in 50 µL Laemmli sample buffer (10% glycerol, 2% SDS, 5% 2-mercaptoethanol,  
775 100 mM DTT, 0.04% bromophenol blue, 62.5 mM Tris-HCl pH6.8) and heat denatured for 5 min at  
776 95° C. Proteins were electrophoretically separated on an 8% polyacrylamide gel and then wet-  
777 transferred to a nitrocellulose membrane (Amersham Protran 0.2 NC, GE Healthcare). Prior to antibody  
778 incubation, membranes were blocked for at least 2 h in 5% PBST-milk (1 x PBS pH 7.4, 0.1% Tween-  
779 20, 5% dry milk). Then, membranes were incubated with primary antibody for 1 h at RT, washed three  
780 times 10 min in PBST (1 x PBS pH 7.4; 0.1% Tween-20) followed by 30 min incubation with secondary  
781 antibody at RT. Membranes were washed again three times for 10 min in PBST before fluorescence  
782 signal was imaged with the CLx ODYSSEY Li-COR. Primary antibodies used were mouse monoclonal  
783 α-V5 (Invitrogen R960-25; 1:2'000) and rabbit monoclonal α-hexokinase (US biologicals, H2035-01;  
784 1:3,000). Secondary antibodies used were goat α-mouse IgG Alexa Fluor 680 (Thermo Fisher  
785 Scientific, A-21057; 1:10,000), and goat α-rabbit IgG IRDye800CW (Li-COR Biosciences, 926-32211;  
786 1:10,000).

## 787 **Spot plating assay**

788 For spot assays of strains overexpressing galactose-inducible Brll derivatives, strains were grown to  
789 saturation in SC medium supplemented with 2% raffinose and 0.1% glucose. Cells were plated on  
790 synthetic medium agar plates supplemented with 2% galactose in a five-fold serial dilution series  
791 starting with an OD<sub>600</sub> of 1.0 using a 48-pin frogger. Strains derived from the *nup116ΔGLFG P<sub>MET3-</sub>*  
792 *NUP188* background were pre cultured in SCD lacking methionine and spotted on synthetic medium  
793 agar plates supplemented with or without methionine (400 µg/ml).

## 794 **Tetrad dissection**

795 Diploid yeast cells were grown on YPD for one day at 30 °C and then transferred to sporulation plates  
796 (SPO; 1% potassium acetate, amino acids to 25% of normal concentration, 0.05% glucose, 2% agar)  
797 and incubated for 5 days at RT. To digest the ascus wall, a pinhead-sized cell mass was incubated in 5  
798 µL of Zymolyase 100T 1 mg/mL (ICN, 320932) for 3 min at 30 °C. Then, 300 µL water was added to  
799 stop the digestion, cells were shortly vortexed and spread on a YPD plate. Tetrads were dissected using  
800 a Nikon Eclipse Ci-S dissecting scope and incubated for 2 days at 30 °C. Spore clones were tested for  
801 genotype segregations by sequencing.

## 802 **Fluorescence microscopy**

803 Cells were immobilized in a 384-well glass bottom plate (MatriPlate) coated with concanavalin A  
804 (Sigma-Aldrich). Imaging was performed with a 100x Plan-Apo VC objective (NA 1.4, Nikon) on a  
805 Nikon inverted epifluorescence Ti microscope equipped with a Spectra X LED light source  
806 (Lumencore) using the NIS Elements software (Nikon) at 30°C unless indicated differently. Images  
807 were acquired with a Flash 4.0 sCMOS camera (Hamamatsu) and processed using ImageJ software.  
808 Imaging of strains expressing the Nup170-RITE constructs was performed with a 100x Plan Apo  
809 lambda objective (NA 1.45oil DIC WD 0.13 mm, Nikon) on a Nikon inverted Widefield Ti2-E  
810 microscope equipped with a Spectra III light engine and an Orca Fusion BT camera using the NIS  
811 Elements software (Nikon) at room temperature. Images were processed using the Denoise.ai and  
812 Clarify.ai algorithms from NIS Elements software and Fiji (Schindelin et al. 2012).

## 813 **Fluorescence recovery after photobleaching (FRAP)**

814 FRAP experiments were performed at room temperature on a Leica TCS SP8-AOBS microscope using  
815 a 63x 1.4NA Oil HC PL APO CS2 objective. Unidirectional scanner at speed of 1400 Hz,  
816 NF488/561/633, an AU of 1.5 and a FRAP booster for bleaching were applied for every FRAP  
817 experiment using the PMT3 (500-551 nm) and PMT5 (575-694 nm) detectors. Image sizes of 512x75  
818 at 80 nm/px were used together with line accumulation of two, yielding a time interval of 120 ms per  
819 frame. 20 pre-bleach and 200 post-bleach frames were acquired. A 488 nm argon laser line was used at  
820 20 % base power in addition to a 561 nm DPSS laser line. Imaging was conducted with 1.5% laser  
821 intensity with a gain of 800 to illuminate the GFP, and 0.3% of the 561 laser power to illuminate  
822 mCherry. Bleaching was performed in a manually defined elliptical region comprising approximately  
823 one-third of the cell nucleus at 100% laser power of both laser lines for 120 ms. For the case of mutant  
824 Brl1, the region was chosen to encompass part of a bright region (herniation). The mobility of GFP-  
825 labeled proteins in the bleached NE region was evaluated by quantifying the signal recovery in the  
826 bleached region. Extracellular background ( $I_{bg}$ ) was subtracted from the intensity of the bleached  
827 region ( $I_{bl}$ ) and the values were bleach-corrected by normalizing for total cell intensity ( $I_{total}$ ) resulting  
828 in  $(I_{bl}-I_{bg})/(I_{total}-I_{bg})$  (Bancaud et al. 2010) using custom written scripts in MATLAB (Mathworks) and  
829 plotted with Prism 7 (GraphPad).

## 830 **Fluorescence microscopy of RITE constructs**

831 All strains expressing NUP-RITE constructs were grown to mid log phase in SCD supplemented with  
832 300 µg/mL hygromycin B (Roche) to select for non-recombined cells. Prior to imaging, cells were  
833 centrifugally collected and recovered for 1 h in SCD without hygromycin B. Recombination was  
834 induced by addition of  $\beta$ -estradiol (1 µM f.c., Sigma-Aldrich) and cells were imaged 3 h post induction.

835 Strains expressing NUP170-RITE constructs were grown to mid log-phase in SD -URA to select for  
836 non-recombined cells. Prior to imaging, recombination was induced by addition of  $\beta$ -estradiol (1  $\mu$ M  
837 f.c., Sigma-Aldrich) and uracil and cells were imaged ~30 min (new Nup170-RITE) or ~5 h (old  
838 Nup170-RITE) post induction.

### 839 **Quantitative image analysis**

840 We used the automated imaging analysis pipeline NuRim to quantify the fluorescence intensity signal  
841 in the nuclear envelope for various NUP GFP fusion proteins (Rajoo et al. 2018; Vallotton et al. 2019).  
842 In brief, nuclear contours were called in an unbiased manner based on the fiducial marker dsRED-  
843 HDEL. Fluorescence intensities of NUP-yEGFP along these contours were then extracted in ImageJ.  
844 NE intensity profiles with large foci in the NE were excluded by using an intensity value standard  
845 variation cutoff of 200, in Brl1-depleted cells this accounted for maximum 35% of the generated masks.  
846 Brightness and contrast of the presented images were adjusted the same for all images in one panel  
847 unless otherwise indicated using Fiji. Graphical representation of the data was carried out in R.

848 For the colocalization plots (Figure 6D & Figure S5B) at least 36 line plots (exact number indicated in  
849 respective figures) were manually generated in Fiji. Values for each line plot were centered according  
850 to the peak intensity of the Brl1(I395D)-mcherry signal and plotted as mean with SD. Graphs were  
851 created with Prism 9.

852 In strains expressing NUP170-RITE fusion proteins, the NE contours were manually delineated based  
853 on the Brl1-mCherry signal and the intensity profiles obtained using Fiji. Pearson's correlation  
854 coefficient between intensity values in green and red channels were calculated. Only cells with foci in  
855 both red and green channels were selected for quantification. The following cells were excluded: NE  
856 contours with no signals in any of the two channels, cells with a strong red background signal, cells that  
857 did not undergo recombination.

### 858 **Recombinant protein expression and purification**

859 The fusion proteins 6xHis-MBP-TEV-yEGFP, 6xHis-MBP-TEV-ahBrl1-yEGFP, 6xHis-MBP-TEV-  
860 ahBrl1- (F391D)-yEGFP and 6xHis-MBP-TEV-ahBrl1(I395D)-yEGFP were expressed in E.coli BL21  
861 RIL cells. Bacteria were cultured in 1 L YT (0.8% Bacto-tryptone, 0.5% Bacto-yeast extract, 86 mM  
862 sodium chloride) to OD600 = 0.8-1.0 at 37°C, and protein expression was induced by adding 0.2mM  
863 IPTG (AppliChem A1008,0025) and cells were grown ON. The next day cells were harvested in a  
864 AF6.100 rotor (Herolab) for 15 minutes at 5'000 RPM at 4 °C. Pellets were resuspended in 20 ml Tris-  
865 HCl (20 mM, pH7.5) supplemented with 10ug/mL DNase I (Roche, 10104159001) and ½ tablet  
866 cComplete Protease Inhibitor Cocktail (Sigma-Aldrich, 05053489001). Cells were lysed using the  
867 Avestin Emulsiflex c5 (ATA Scientific) and centrifuged at 4°C for 15 minutes at 12'000 RPM in the  
868 SS-34 rotor (Thermo Scientific). Supernatant was filtered through a 0.45  $\mu$ m filter, applied to ~1ml Ni-

869 NTA Agarose (Qiagen 30210), and incubated for 1 h at 4°C. The agarose was washed thoroughly with  
870 20 mM Tris-HCl pH 7.5, 500mM NaCl, 30mM Imidazole prior to elution with 20 mM TrisHCl pH 7.5,  
871 500 mM NaCl, 400 mM Imidazole. Purified proteins were dialysed ON in 20 mM Tris pH 7.5, 150 mM  
872 NaCl at 4°C, concentrated in 1 mL in a Vivaspin Turbo 4 (30'000 MWCO, Sartorius VS04T22) and  
873 further purified on a Superdex 75 10/300 gel filtration column (GE Healthcare).

#### 874 **Liposome binding assay**

875 Liposome generation and flotation was performed as described in Vollmer et al. (Vollmer et al. 2015).  
876 In short, *E. coli* polar lipids (Avanti polar lipids) dissolved in chloroform and supplemented with 0.2  
877 mol % 18:1 Liss Rhodamine PE (Avanti polar lipids) were vacuum dried on a rotary evaporator,  
878 dissolved as liposomes in PBS by freeze/thawing cycles and extruded by passages through Nuclepore  
879 Track-Etched Membranes (Whatman) with defined pore sizes using an Avanti Mini-Extruder to  
880 generate small unilamellar liposomes of defined sizes. For liposome flotations proteins (6 µM) were  
881 mixed 1:1 with liposomes (6 mg/ml) and floated for 2h at 55 000 rpm in a TLS-55 rotor (Beckman) at  
882 25°C through a sucrose gradient. Binding efficiency was determined by Western Blot analysis using an  
883 EGFP-antibody (Roche 11814460001) and the ImageQuant LAS-4000 system (Fuji) and the AIDA  
884 software, comparing band intensities of start materials with floated liposome fraction.

#### 885 **Sequence alignment**

886 Sequence alignment was performed using the COBALT web server  
887 ([https://www.ncbi.nlm.nih.gov/tools/cobalt/re\\_cobalt.cgi](https://www.ncbi.nlm.nih.gov/tools/cobalt/re_cobalt.cgi)) and visualized using Jalview (Waterhouse et  
888 al. 2009).

#### 889 **Cryo-FIB milling of yeast cells**

890 Brl1 of exponentially growing yeast cells was inducibly depleted as described above. As control for the  
891 Brl1 degradation, cells lacking *OsTIR1* were treated for 4-4.5 h with auxin. Brl1(I395D) overexpressing  
892 cells were grown as described above and as a control, cells overexpressing Brl1 were cultured for 6 h  
893 in SC 2% galactose. Cells were pipetted onto Quantifoil Cu R2/1 grids (Quantifoil), blotted for ~4 s  
894 and plunge frozen using a manual plunger. Blotting was performed manually from the backside of the  
895 grid. Cryo FIB-milling was performed essentially as previously described (Wagner et al. 2020). In brief,  
896 the grids were transferred to a Leica BAF060 system equipped with a Leica cryo transfer system at -  
897 160° C and grids were coated with ~5 nm Pt/C. Afterwards grids were transferred to a Zeiss Auriga 40  
898 Crossbeam FIB-SEM equipped with cryostage and cryo-transfer shuttle. An organometallic platinum  
899 layer was deposited using the integrated gas injection system. Cells were milled in three steps at 30 kV  
900 using rectangle patterns (240 pA to ~200 µm, 120 pA to ~100 µm, 50/30 pA to <0.3 µm) to a target  
901 thickness of <250 nm and samples were stored in liquid nitrogen until data acquisition.

## 902 **Cryo Electron tomography**

903 Tilt series of FIB-milled lamella were acquired using a Titan Krios equipped with a Gatan Quantum  
904 Energy Filter and a K2 Summit electron detector or a Titan Krios G3i equipped with a Gatan  
905 BioQuantum Energy Filter and K3 direct electron detector at 300 kV. Tilt series were acquired using  
906 SerialEM (Mastrorade 2003) at a pixel size of 3.4 Å at the specimen level. The target defocus was set  
907 to -4 to -7 μm and tilt series were acquired using a dose symmetric tilt scheme (Hagen, Wan, and Briggs  
908 2017) from -65° to 55° with an increment of 3° and a total dose of ~140 electrons per angstrom squared.

## 909 **Tomogram reconstruction**

910 Movie frames were aligned using IMODs alignframes function (Mastrorade and Held 2017). Tilt series  
911 were processed and aligned using the IMOD suite. Alignment was performed using the 4x binned  
912 projections and the patch tracking function in IMOD. Outliers in patch tracking (e.g., patch aligning on  
913 ice contamination) were manually corrected. Occasionally, contaminations on top of the lamella were  
914 used as fiducial markers. Overview tomograms for particle picking were reconstructed using the SIRT-  
915 like filter with 12x iterations and 4x binning. NPCs and NPC-herniations coordinates and rough  
916 orientation along the nuclear envelope were picked and determined manually.

## 917 **Quantification of herniations and NPCs**

918 For the quantification of herniations and NPCs in Br11 depleted cells we used 51 tomograms. For this  
919 analysis we also included tomograms with lower quality which we did not include in the subtomogram  
920 analysis described below. For the control condition we used 27 tomograms of cells subjected to the  
921 same treatment but without *O<sub>s</sub>TIR1* plasmid. For the quantification of herniations and NPCs in  
922 Br11(I395D) overexpressing cells, 50 tomograms were analyzed. For our control condition in cells  
923 overexpressing Br11 without the point mutation we used 17 tomograms. To compensate for the different  
924 surface area of NE in tomograms, we normalized the number of NPCs and herniations by the area of  
925 NE in each tomogram. For this, we manually segmented the NE in three tomographic slices using the  
926 drawing tool in IMOD. Segmentations for all other slices were interpolated. We then calculated the  
927 distance between segmentation points to determine the total visible surface area in MATLAB and used  
928 Prism 9 (GraphPad) for visualization.

## 929 **Subtomogram averaging**

930 Subtomograms containing NPCs or herniations were reconstructed in IMOD from unbinned, dose-  
931 filtered and CTF-corrected tilt series. CTF was corrected as described previously by estimating the  
932 mean defocus by strip-based periodogram averaging. With the information for the mean defocus, the  
933 tilt angle and axis orientation, the defocus gradient for each projection was calculated and according to  
934 the defocus gradient, each projection was CTF-corrected by phase flipping (Eibauer et al. 2015). CTF-

935 corrected stacks were dose-filtered using the IMOD `mtffilter` function and subtomograms reconstructed  
936 using IMOD.

937 We reconstructed 85 herniation-containing subtomograms from 31 tomograms of Br11-depleted cells.  
938 Based on the curvature of the ONM, herniations were classified manually into INM-evaginations (n=25)  
939 and herniations (n=60). When the ONM was not or only slightly deformed we classified the herniation  
940 as an INM-evagination (examples in figure S2D). As a control we reconstructed 29 mature NPC from  
941 19 tomograms of the same dataset. For Br11(I395D) overexpressing cells, we reconstructed 47  
942 herniations from 21 tomograms.

943 Prealigned full NPCs/herniations were aligned using iterative missing wedge weighted subtomogram  
944 alignment and averaging using the TOM toolbox (Friedrich et al. 2005; Nickell et al. 2005), by merging  
945 the half set averages after each iteration as a template for the next iteration. 8x binned subtomograms  
946 were aligned using 8-fold rotational symmetry. For averaging mature NPCs and Br11(I395D)  
947 herniations we further extracted 8 protomers (4x binned) according to the 8fold symmetry of the NPC.  
948 Protomers outside the lamella were excluded by manual inspection. For mature NPCs we used 179  
949 protomers (53 excluded from 232 protomers) for the final average. For Br11(I395D) herniations we used  
950 237 protomers (139 excluded from 376 protomers) for the final average.

951 For the different forms of herniations in Br11 depleted conditions, protomer alignment did not improve  
952 the maps. We think that resolution of these averages is limited because of the high heterogeneity of  
953 herniations in overall shape and membrane curvature. We also believe that the electron-dense center of  
954 herniations in Br11-depleted cells limited the resolution of our average. Several trials with different  
955 masks, bandpass filters and classification based on membrane curvature did not improve resolution.  
956 Further, our subtomogram average of herniations in Br11(I395D) overexpressing cells, which do not  
957 have an electron-dense center, shows distinct IR-like densities, and is better resolved although less  
958 subtomograms were used.

959 Resolution was determined using masked half maps and the webserver  
960 <https://www.ebi.ac.uk/emdb/validation/fsc>. Final maps were filtered according to the achieved  
961 resolution at FSC 0.5 (INM-evaginations: 12 nm, herniations (Br11-AID): 11 nm, Br11(I395D)  
962 herniation: 8 nm, mature NPC: 8 nm). The full-pore map for the mature NPC and the Br11(I395D)  
963 herniations were stitched from single protomers by fitting the protomer-average into the full-NPC map  
964 in UCSF Chimera (Pettersen et al. 2004).

## 965 **AlphaFold prediction**

966 To predict the structure of Br11 we used the python script for AlphaFold2.1.1 (Jumper et al. 2021)  
967 implemented in SBGrid with standard settings and the `mode_preset=monomer_ptm` setting. Since we  
968 locally predicted the structure of Br11, it is not identical to the structure in the AlphaFold database.  
969 However, the structured part is almost identical (rmsd: 1.35 Å) and only the unstructured N- and C-

970 termini deviate between the structures significantly. Visualization of prediction metrics were generated  
971 using the following jupyter notebook in Anaconda:  
972 <https://colab.research.google.com/drive/1CizC7zmYvFkav5qfBbWxhgUhrOxwym2w>).

### 973 **Dimension-measurements on onion-like herniations in Br11(I395D) overexpressing cells**

974 4x binned tomograms of Br11(I395D) overexpressing cells were processed in Fiji using a Gaussian blur  
975 with a sigma of 1 and contrast was inverted. Per onion-like herniation, 3-4 line plots were generated  
976 and exported to MATLAB. Peaks (=membranes) of the line plots were determined by Gaussian fit of  
977 the peaks. 11 onion-like herniation from 8 tomograms were analyzed. The same procedure was  
978 performed on the NE of tomograms of Br11 overexpressing cells. 6-9 line plots per NE were generated  
979 and 5 NE from 5 tomograms were analyzed. Only tomograms where the herniation or the NE were  
980 roughly perpendicular in the section were used. Visualization and statistical tests performed in Prism 9.  
981

### 982 **Visualization of tomograms and subtomograms**

983 Snapshots of single NPCs or herniations were extracted from 4x binned tomograms reconstructed in  
984 IMOD using the SIRT like filter with 12 iterations and visualized using tom\_volxyz (Figure S2D and  
985 7C). All tomographic slices shown were reconstructed using IMOD's SIRT like filter with 12 iterations  
986 and slice thickness is indicated in figure legends.  
987 All procedures were implemented in MATLAB and using the TOM toolbox. Chimera, IMOD and  
988 Alphafold were used as part of SBGrid (Morin et al. 2013).

### 989 **Preparation of IgG-Coupled Dynabeads**

990 IgG-coupled Dynabeads were prepared as described in Alber et al (Alber et al. 2007). 150 mg of  
991 magnetic Dynabeads were resuspended in 9 mL fresh 0.1 M sodium phosphate buffer (22.5 mM  
992 monosodium phosphate, 81 mM disodium phosphate, pH 7.4). Bead suspension was vortexed for 30 s  
993 followed by a 10 min incubation at room temperature under constant agitation. Then, beads were placed  
994 onto a magnetic holder, clear buffer was aspirated off and beads were washed once with 4 mL 0.1 M  
995 sodium phosphate buffer. Antibody mix was prepared by resuspending 50 mG rabbit IgG powder in 2.1  
996 mL distilled water and spinning down the mixture for 10 min at 15'000 g in a tabletop centrifuge  
997 precooled to 4° C. Clear supernatant was transferred to a fresh falcon tube and 4.275 mL 0.1 M sodium  
998 phosphate buffer was added. To this, 3 M ammonium sulfate buffer (3 M ammonium sulfate dissolved  
999 in 0.1 M sodium phosphate buffer) was added slowly, constantly shaking the mixture. The antibody  
1000 mix was then filtered through a 22 µm Millex GP filter and was ready for use. The magnetic Dynabeads  
1001 were incubated with the antibody mix for ~ 20 h on a rotating wheel at 30° C. Thereafter, beads were  
1002 briefly washed once with 100 mM glycine HCl pH 2.5, 10 mM Tris-HCl pH 8.8 and 100 mM freshly



1003 prepared triethylamine. This was followed by four 5 min washes with PBS pH 7.4 and two 10 min  
1004 washes with PBS pH 7.4 containing 0.5% Triton X-100. Beads were finally resuspended in a total of 1  
1005 mL PBS supplemented with 0.02 % sodium azide resulting in a concentration of 100 mg beads/mL and  
1006 stored at 4°C

### 1007 **Metabolic labeling assays**

1008 Yeast strains harboring endogenously tagged Br11-ZZ or Nup170-ZZ fusion proteins were cultured for  
1009 a minimum of 16 h at 30°C in light SCD. Cell culture samples equivalent to 250 mL OD<sub>600</sub> = 1.0 were  
1010 collected by filtration on an 0.8 µL nitrocellulose membrane. During harvesting, the cells were briefly  
1011 washed twice with 25 mL distilled water directly on the filter membrane and then snap-frozen in liquid  
1012 nitrogen. Samples corresponding to the 0 h timepoint were collected immediately before labeling onset.  
1013 Thereafter, cell cultures were pulse labeled as follows, the amount of log-phase cell cultures  
1014 corresponding to 650 mL of OD<sub>600</sub> = 1.0 were washed them on the filter with 50 mL heavy SCD  
1015 containing 13C6, 15N2 l-lysine (25 mg/L, Cambridge Isotope Laboratories) and reinoculated in heavy  
1016 SCD. For the experiments with the Br11-AID constructs, cultures were split in half and switched to  
1017 heavy SCD containing IP6 (4 µM f.c.) and either auxin (500 µM f.c.) or the equivalent volume of  
1018 ethanol for the solvent control. Post labeling timepoints were collected in regular intervals as described  
1019 above. During the time course all cultures were maintained in logarithmic growth by periodic dilution  
1020 with the respective prewarmed medium.

### 1021 **Affinity pulldowns**

1022 All the following procedures were performed under ice cold conditions. Frozen yeast pellets were  
1023 resuspended in 1 mL Lysis Buffer (20 mM HEPES pH 7.5, 50 mM KOAc, 20 mM NaCl, 2 mM MgCl<sub>2</sub>,  
1024 1 mM DTT, 10% v/v glycerol) and transferred into 2 ml screw-cap micro tubes (Sarstedt Inc) pre-filled  
1025 with approximately 1 ml of 0.5 mm glass beads (Biospec products). Cell material was spun down in a  
1026 tabletop centrifuge and the tubes were filled up completely with Lysis Buffer. During this step, extra  
1027 care was taken to avoid any air inclusion. Cells were mechanically lysed with a mini BeadBeater-24  
1028 (BioSpec Products) in four 1 min cycles at 3500 oscillations per minute with 1 min cooling  
1029 intermissions in ice-water. Cell lysates were then spun down for 30 s at 15'000 g in a table-top  
1030 centrifuge precooled to 4 °C. 150 µL of the supernatant was frozen in liquid nitrogen for the analysis  
1031 of the source cell lysates. For the affinity pulldowns, 1 mL of the supernatant was supplemented with  
1032 110 µL 10 x Detergent mix (protease inhibitor cocktail (Sigma-Aldrich), 5% v/v Triton x-100, 1% v/v  
1033 Tween-20 in Lysis Buffer) and 2 mg IgG Dynabeads, pre-equilibrated two times with Equilibration  
1034 Buffer (0.5% v/v Triton X-100 and 0.1% v/v Tween-20 in Lysis Buffer). The remaining supernatant  
1035 was frozen in liquid nitrogen for the analysis of the source cell lysates. Following a 30 min incubation  
1036 of the affinity pulldown samples at 4°C under constant agitation, the beads were washed twice with 1

1037 ml Wash Buffer (0.1% v/v Tween-20 in Lysis Buffer). Proteins were eluted in 40  $\mu$ L 1x Laemmli  
1038 sample buffer for 2 min at 50°C. Finally, elutes were completely denatured at 95°C for 5 min and frozen  
1039 in liquid nitrogen.

#### 1040 **In-gel tryptic digestion**

1041 Eluted proteins were electrophoretically concentrated by SDS-PAGE in a 4% acrylamide stacking gel.  
1042 Proteins were visualized by incubation with Coomassie SimplyBlue SafeStain (Invitrogen), followed  
1043 by destaining for at least 14 h in distilled water. Protein bands were cut out and processed according to  
1044 a standard in-gel digestion protocol. In brief, disulfide bonds were reduced with dithiothreitol (6.5 mM  
1045 DTT in 100 mM ammonium bicarbonate) for 1 h at 60° C, proteins were alkylated with iodoacetamide  
1046 (54 mM in 100 mM ammonium bicarbonate) for 30 min at 30° C in the dark and finally tryptically  
1047 digested with 1.25  $\mu$ g of sequencing grade porcine trypsin (Promega) in 100 mM ammonium  
1048 bicarbonate at 37° C for 16 h. The resulting peptides were loaded in pre-equilibrated C18 BioPureSPN  
1049 mini columns (The Nest Group, Inc.), washed and desalted 3 times with Buffer A (0.1% formic acid in  
1050 HPLC-grade water), eluted three times with 50  $\mu$ L Buffer B (50% acetonitrile, 0.1% formic acid in  
1051 HPLC-grade water) and finally recovered in 12.5  $\mu$ L Buffer A supplemented with iRT peptides (1:50  
1052 v:v, Biognosys).

#### 1053 **Tryptic digestion of source cell lysates**

1054 The source lysates of Br11 APs 90 min post labeling were adjusted to 50  $\mu$ L with a protein concentration  
1055 of 4  $\mu$ g/ $\mu$ L with lysis buffer as determined by the Bradford method (Bio-Rad). Samples were diluted  
1056 with 200  $\mu$ L guanidine chloride (7 M in 100 mM ammonium bicarbonate) to reach a final guanidine  
1057 chloride concentration of 5.6 M. Disulfide bonds were reduced with DTT (6.5 mM f.c.) at 37° C for 45  
1058 min and alkylated with iodoacetamide supplemented to 54 mM f.c. at 30° C in the dark for 30 min. The  
1059 samples were then diluted to a final guanidine chloride concentration of 1 M with 100 mM ammonium  
1060 bicarbonate and digested with sequencing grade porcine trypsin (Promega, 1:100 trypsin:protein) for  
1061 22 h at 37° C. Digestion was quenched by addition of 3% (v/v) of 100% formic acid (pH ~2.0 ) and  
1062 peptides were desalted in a BioPureSPN MACRO spin columns (The Nest Group, Inc.) as described  
1063 above (Tryptic in-gel digestion). Tryptic peptides were diluted to 1  $\mu$ g/ $\mu$ L with Buffer A based on OD<sub>280</sub>  
1064 readouts and the samples were spiked with 1:50 (v:v) iRT peptides (Escher et al. 2012) for the mass  
1065 spectrometry acquisition.

#### 1066 **Lysate intermixing tests**

1067 For the lysate intermixing tests 200 OD<sub>600</sub> of an untagged cell culture grown in heavy medium was  
1068 mixed with the equivalent amount of cell culture expressing an affinity tagged protein and grown in  
1069 light medium. The mixture was subjected to the affinity isolation procedure and processed for mass

1070 spectrometric analysis as described above. For Br11-AID strains, the depletion was induced 5 h prior to  
1071 harvesting by addition of IP6 (4  $\mu$ M f.c.) and either auxin (500  $\mu$ M f.c.) or ethanol for the solvent  
1072 control.

### 1073 **DDA MS assays**

1074 Unlabeled Br11 AP samples were assayed in a data-dependent acquisition mode (DDA), for subsequent  
1075 spectral library generation (*see "DIA MS data extraction"*). LC-MS/MS analysis was performed on an  
1076 Orbitrap Fusion Lumos Tribrid mass spectrometer (Thermo Scientific) coupled to an EASY-nLC 1200  
1077 system (Thermo Scientific). Peptides were separated on an Acclaim PepMap 100 C18 (25 cm length,  
1078 75  $\mu$ m inner diameter) with a two-step linear gradient from 5% to 30% acetonitrile in 120 minutes and  
1079 from 30% to 40% acetonitrile in 10 minutes at a flow rate of 300 nl/min. The DDA acquisition mode  
1080 was set to perform one MS1 scan followed by MS2 scans for a cycle time of 3 s. The MS1 scan was  
1081 performed in the Orbitrap (R = 120'000, 100'000 AGC target, maximum injection time of 100 ms and  
1082 scan range 350-1400 m/z). Peptides with charge state between 2-7 were selected for fragmentation  
1083 (isolation window: 1.6 m/z and fragmentation with HCD, NCE 28%) and MS2 scans were acquired in  
1084 a Orbitrap (R = 30'000, 100'000 AGC target, maximum injection time of 54 ms). A dynamic exclusion  
1085 of 30 s was applied.

### 1086 **DIA MS assays**

1087 Data independent acquisition (DIA) assays were performed on two different instrument setups (Orbitrap  
1088 Fusion Lumos Tribrid (DIA:A) for the Br11 AP samples and Orbitrap QExactive+ (DIA:B) for the  
1089 Nup170 AP samples and the lysis intermixing assays).

1090 DIA:A. LC-MS/MS analysis was performed on an Orbitrap Fusion Lumos Tribrid mass spectrometer  
1091 (Thermo Scientific) coupled to an EASY-nLC 1200 system (Thermo Scientific). Peptides were  
1092 separated as described in "*DDA MS assays*". DIA acquisition was performed with the following  
1093 parameters: one MS1 scan (350-2000 m/z) with variable windows from 350 to 1150 m/z with 1m/z  
1094 overlap for a cycle time of 3 s. Ions were fragmented with HCD (NCE 28%). The MS1 scan was  
1095 performed at 120'000 R, 200'000 AGC target and 100 ms injection time, the MS2 scan at 30'000 R,  
1096 500'000 AGC target and 54 ms injection time.

1097 DIA:B. LC-MS/MS was performed on an Orbitrap QExactive+ mass spectrometer (Thermo Fisher)  
1098 coupled to an EASY-nLC-1000 liquid chromatography system (Thermo Fisher). Peptides were  
1099 separated using a reverse phase column (75  $\mu$ m ID x 400 mm New Objective, in-house packed with  
1100 ReproSil Gold 120 C18, 1.9  $\mu$ m, Dr. Maisch GmbH) across a two-step linear gradient: from 3% to 25%  
1101 acetonitrile in 160 min and from 24% to 40% in 20 min at a flow rate of 300 nl/min. DIA acquisition  
1102 was performed with the following parameters: one MS1 scan (350-1500 m/z) with 20 variable windows  
1103 from 350 to 1400 m/z with 1m/z overlap. Ions were fragmented with HCD (NCE 25%). The MS1 scan

1104 was performed at 70'000 R, 3'00'000 AGC target and 120 ms injection time, the MS2 scan at 35'000  
1105 R, 1'000'000 AGC target and auto injection time.

### 1106 **PRM MS assays**

1107 Parallel reaction monitoring (PRM) assays were performed with the two different instrument setups  
1108 described in “*DIA MS assays*” (Orbitrap Fusion Lumos Tribrid (PRM:A) and Orbitrap QExactive+  
1109 (PRM:B)).

1110 PRM:A. Peptides were separated as described in “*DIA MS assays - DIA:A*”. MS analysis of the targeted  
1111 peptides was set up with the combination of one untargeted MS1 scan (120'000 R, 200'000 AGC  
1112 Target, injection time 100 ms) followed by 106 scheduled targeted scans (AGC = 450'000, resolution  
1113 and injection time was variable based on peptide response) using an isolation window of 1.8 m/z and  
1114 HCD fragmentation (NCE = 28%).

1115 PRM:B. Peptides were separated using a reverse phase column (75 µm ID x 400 mm New Objective,  
1116 in-house packed with ReproSil Gold 120 C18, 1.9 µm, Dr. Maisch GmbH) across a linear gradient from  
1117 5% to 40% acetonitrile in 90 min. MS acquisition of the targeted peptide was set up with the  
1118 combination of one untargeted MS1 scan (70'000 R, 3'000'000 AGC Target, injection time 100 ms)  
1119 followed by 55 scheduled targeted scan (AGC = 1'050'000, resolution 35'000 and 110 ms injection  
1120 time) using an isolation window of 1.8 m/z and HCD fragmentation (NCE = 27%)

### 1121 **PRM data analysis**

1122 The metabolic labeling of proteins in the source cell lysates was analyzed by parallel reaction  
1123 monitoring MS (PRM) 90 min after the pulse labeling onset. Probed proteins included NUPs that  
1124 exhibited outstandingly high or low labeling kinetics in the Br11 AP, two NTRs (Kap123 and Mex67)  
1125 and two randomly picked co-purified proteins (Rrp5 and Acc1). Precursors for the targeted analysis  
1126 were selected based on good labeling consistency with other peptides of the same protein, high intensity  
1127 and low number of missing values in the Br11 APs. Peptides with missed cleavage sites or with cysteine  
1128 and methionine residues were excluded when possible. All proteins were represented by 2-5 peptides.  
1129 Targeted data analysis was performed as described in “*PRM MS assays*” and resulting intensities were  
1130 analyzed with Skyline daily (64 bit, 20.1.1.213 version). Precursor ions identified by at least 3-4  
1131 coeluting light and heavy transitions were quantified by manual peak integration. For precursor ions  
1132 that were well detected in both heavy and light channels the respective intensities were calculated as  
1133 the sum of the top3 most intense transitions in each channel. Fractional protein labeling was quantified  
1134 as  $H / (H + L)$ , where H and L are the summed intensities of the above protein-born precursors in heavy  
1135 and light channels, respectively.

## 1136 **DIA MS data extraction**

1137 Two Hybrid spectral libraries were generated with Spectronaut v.15 (Biognosys AG) using the  
1138 combination of 20 DDA and 30 DIA datasets originating from APs with 10 NUP baits (Onischenko et  
1139 al. 2020), and 4 DIA and 6 DDA datasets from Br11 and Nup170 bait APs acquired in this study. The  
1140 label-free assay library contained b and y transition ions (for a total of 3'918 protein groups, 75'780  
1141 precursors and 105'089 transitions). The SILAC assay library comprised y transitions only, with the  
1142 heavy-channel (K+8.014199) generated *in silico* using the “inverted spike in” workflow (for a total of  
1143 3'825 protein groups, 97'069 precursors). Only tryptic peptides with a maximum of two missed  
1144 cleavages were considered. Carbamidomethylation was set as fixed modification and methionine  
1145 oxidation was set as variable modification. Spectra were searched against the SGD protein database  
1146 (downloaded on 13.10.2015, 6'713 entries) concatenated with entries for contaminants and iRT  
1147 peptides using a 1% FDR control at peptide and protein level.

1148 The label-free and SILAC DIA datasets were extracted with the respective spectral libraries using  
1149 Spectronaut v.15 (Biognosys AG). Default settings were used for the chromatogram extraction, except  
1150 the machine learning option was set to “across experiment” and “cross run normalization” was  
1151 excluded. The ion intensities at the fragment level were exported for further analysis in R. Raw MS  
1152 data, the spectral libraries and the DIA data extractions generated with Spectronaut are uploaded in the  
1153 PRIDE repository.

## 1154 **Labeling quantification in affinity pulldowns**

1155 Analysis of protein labeling in KARMA assays with Br11 bait was implemented in R  
1156 (“*Labeling\_BRLIAP.R*”). Initially, low quality fragment ions were excluded from further analysis based  
1157 on the Spectronaut “F.ExcludedFromQuantification” flag. Additionally, only proteotypic y-type  
1158 fragment ions with a single lysine residue that were found in both heavy and light channels were  
1159 retained. The remaining fragment ion intensities were summed for each precursor in heavy and light  
1160 channels as the respective precursor intensity. Unreliable precursor ions that were detected in fewer  
1161 than two out of three biological replicates in any of the three post labeling time points (30, 60 and 90  
1162 min) were also excluded. The fractional labeling of the remaining precursor ions was then calculated as  
1163  $H / (H + L)$ , where H and L are the precursor intensities in heavy and light channels. The median protein  
1164 labeling within each sample was computed as the median fractional labeling of all precursors. As an  
1165 additional quality criterion, we also computed the root mean square error (RMSE) of the labeling values  
1166 for every precursor from the respective protein median across all nine samples. For any protein, the  
1167 precursors with the 50% highest RMSEs were discarded, and the final protein labeling was computed  
1168 as the median fractional labeling of the remaining high quality precursors. As a last filtration step,  
1169 proteins with visually noisy labeling trajectories across the biological replicates and timepoints were  
1170 excluded in a blinded manner. For the comparison of NUP labeling rates with Br11 bait and ten NUP

1171 baits (Figure 2B and S1C), only NUPs reproducibly found with all 11 baits were considered. For Figure  
1172 S1C the median from three biological replicates was taken and labeling values were normalized to the  
1173 bait labeling.

1174 Protein labeling in the Nup170 APs of Br11-AID strains (“*Labeling\_NUP170AP\_BRL1AID.R*”) was  
1175 analyzed the same way as for Br11 APs, except that precursor ions found in at least one out of three  
1176 replicates in all post labeling time points were also considered for quantification. The fractional labeling  
1177 ratio between the auxin treated cells and the ethanol solvent control was calculated for each biological  
1178 replicate and post labeling time point (4 h, 4.5 h and 5 h) and the average  $\pm$  SEM is plotted (Figure 4C-  
1179 D).

1180 For the lysate intermixing assays (“*LysisIntermixingTest.R*”) the protein fractional labeling was  
1181 quantified essentially as described above except that low intensity precursor ions (< 100) were filtered  
1182 out and only proteins characterized by more than three precursor ions were considered (due to the low  
1183 extent of intermixing, Br11 bait is only characterized by two precursor ions that were found in both  
1184 heavy and light). To get the intermixing extent, NUP fractional labeling was normalized to the mean  
1185 fractional labeling of all co-purified proteins.

### 1186 **Label-free quantification in affinity pulldowns**

1187 The exact specification of the quantitative analysis pipeline of protein abundances is given by the  
1188 respective code in R (“*Label-Free\_BRL1AP.R*”). In brief, NUP abundances in the affinity pulldown  
1189 with Br11 bait, low quality fragment ions were excluded based on Spectronaut  
1190 “F.ExcludedFromQuantification” flag. For each proteotypic precursor ion all remaining fragment ions  
1191 were summed and resulting intensities were median normalized across samples. Precursor ions that  
1192 were not found in all three biological replicates were omitted. Protein intensities were calculated based  
1193 on the average of the top3 most intense precursor ions, only considering NUPs and NTRs characterized  
1194 by a minimum of three ions and also reproducibly found in the KARMA assay with Br11 bait. The  
1195 intensity of proteins in APs with NUP baits was essentially quantified the same, except that only  
1196 precursor found in three replicates with all ten handles were considered for quantification. To assess the  
1197 enrichment differences between the early and late tier baits for all 1523 co-purified proteins (Figure  
1198 S1A), for each bait the median protein intensity of three biological replicates was taken. Then, the fold  
1199 difference between the median of all baits from a respective assembly tier was calculated. To focus on  
1200 non-NPC proteins NUPs and NTRs were excluded.

### 1201 **Statistics and data visualization**

1202 No statistical method was used to estimate sample sizes. The statistical analysis and data exclusion  
1203 criteria are discussed throughout the text. Statistical tests were carried out in R v. 4.1.2 (R Project),  
1204 Excel (Microsoft) or Prism (GraphPad). The statistical test that was performed, sample size n and P

1205 values are indicated in the respective figure legends. Figure panels were generated using inkscape 1.1  
1206 and Adobe Illustrator v. 26.0.3 (Adobe).

## 1207 **References**

- 1208 Akey, Christopher W., Digvijay Singh, Christna Ouch, Ignacia Echeverria, Ilona Nudelman, Joseph M.  
1209 Varberg, Zulin Yu, Fei Fang, Yi Shi, Junjie Wang, Daniel Salzberg, Kangkang Song, Chen Xu,  
1210 James C. Gumbart, Sergey Suslov, Jay Unruh, Sue L. Jaspersen, Brian T. Chait, Andrej Sali, Javier  
1211 Fernandez-Martinez, Steven J. Ludtke, Elizabeth Villa, and Michael P. Rout. 2022.  
1212 “Comprehensive Structure and Functional Adaptations of the Yeast Nuclear Pore Complex.” *Cell*  
1213 185(2):361-378.e25.
- 1214 Alber, Frank, Svetlana Dokudovskaya, Liesbeth M. Veenhoff, Wenzhu Zhang, Julia Kipper, Damien  
1215 Devos, Adisetyantari Suprpto, Orit Karni-Schmidt, Rosemary Williams, Brian T. Chait, Michael  
1216 P. Rout, and Andrej Sali. 2007. “Determining the Architectures of Macromolecular Assemblies.”  
1217 *Nature* 450(7170):683–94.
- 1218 Allegretti, Matteo, Christian E. Zimmerli, Vasileios Rantos, Florian Wilfling, Paolo Ronchi, Herman  
1219 K. H. Fung, Chia-Wei Lee, Wim Hagen, Beata Turoňová, Kai Karius, Mandy Börmel, Xiaojie  
1220 Zhang, Christoph W. Müller, Yannick Schwab, Julia Mahamid, Boris Pfander, Jan Kosinski, and  
1221 Martin Beck. 2020. “In-Cell Architecture of the Nuclear Pore and Snapshots of Its Turnover.”  
1222 *Nature* 586(7831):796–800.
- 1223 Bancaud, Aurélien, Sébastien Huet, Gwénaél Rabut, and Jan Ellenberg. 2010. “Fluorescence  
1224 Perturbation Techniques to Study Mobility and Molecular Dynamics of Proteins in Live Cells:  
1225 FRAP, Photoactivation, Photoconversion, and FLIP.” *Cold Spring Harbor Protocols*  
1226 2010(12):pdb.top90.
- 1227 Bley, Christopher J., Si Nie, George W. Mobbs, Stefan Petrovic, Anna T. Gres, Xiaoyu Liu, Somnath  
1228 Mukherjee, Sho Harvey, Ferdinand M. Huber, Daniel H. Lin, Bonnie Brown, Aaron W. Tang,  
1229 Emily J. Rundlet, Ana R. Correia, Shane Chen, Saroj G. Regmi, Mary Dasso, Alina Patke,  
1230 Alexander F. Palazzo, Anthony A. Kossiakoff, and André Hoelz. 2021. “Architecture of the  
1231 Cytoplasmic Face of the Nuclear Pore.” *BioRxiv*.
- 1232 De Bruyn Kops, A. and C. Guthrie. 2001. “An Essential Nuclear Envelope Integral Membrane Protein,  
1233 Brr6p, Required for Nuclear Transport.” *EMBO Journal* 20(15):4183–93.
- 1234 Cibulka, Jakub, Fabio Bisaccia, Katarina Radisavljević, Ricardo M. Gudino Carrillo, and Alwin Köhler.  
1235 2022. “Assembly Principle of a Membrane-Anchored Nuclear Pore Basket Scaffold.” *Science*  
1236 *Advances* 8:44–47.
- 1237 Dawson, T. Renee, Michelle D. Lazarus, Martin W. Hetzer, and Susan R. Wentz. 2009. “ER Membrane-  
1238 Bending Proteins Are Necessary for de Novo Nuclear Pore Formation.” *The Journal of Cell*

- 1239 *Biology* 184(5):659–75.
- 1240 Deng, Min and Mark Hochstrasser. 2006. “Spatially Regulated Ubiquitin Ligation by an ER/Nuclear  
1241 Membrane Ligase.” *Nature* 443(7113):827–31.
- 1242 Doucet, Christine M. and Martin W. Hetzer. 2010. “Nuclear Pore Biogenesis into an Intact Nuclear  
1243 Envelope.” *Chromosoma* 119(5):469–77.
- 1244 Doucet, Christine M., Jessica A. Talamas, and Martin W. Hetzer. 2010. “Cell Cycle-Dependent  
1245 Differences in Nuclear Pore Complex Assembly in Metazoa.” *Cell* 141(6):1030–41.
- 1246 Drozdetskiy, Alexey, Christian Cole, James Procter, and Geoffrey J. Barton. 2015. “JPred4: A Protein  
1247 Secondary Structure Prediction Server.” *Nucleic Acids Research* 43(W1):W389-94.
- 1248 Eibauer, Matthias, Mauro Pellanda, Yagmur Turgay, Anna Dubrovsky, Annik Wild, and Ohad Medalia.  
1249 2015. “Structure and Gating of the Nuclear Pore Complex.” *Nature Communications* 6(1):7532.
- 1250 Escher, Claudia, Lukas Reiter, Brendan MacLean, Reto Ossola, Franz Herzog, John Chilton, Michael  
1251 J. MacCoss, and Oliver Rinner. 2012. “Using IRT, a Normalized Retention Time for More  
1252 Targeted Measurement of Peptides.” *Proteomics* 12(8):1111–21.
- 1253 Fernandez-Martinez, Javier and Michael P. Rout. 2021. “One Ring to Rule Them All? Structural and  
1254 Functional Diversity in the Nuclear Pore Complex.” *Trends in Biochemical Sciences* 46(7):595–  
1255 607.
- 1256 Floch, Aurélie G., David Taresté, Patrick F. J. Fuchs, Anne Chadrin, Ikrame Naciri, Thibaut Léger,  
1257 Gabriel Schlenstedt, Benoit Palancade, and Valérie Doye. 2015. “Nuclear Pore Targeting of the  
1258 Yeast Pom33 Nucleoporin Depends on Karyopherin and Lipid Binding.” *Journal of Cell Science*  
1259 128(2):305–16.
- 1260 Ford, Marijn G. J., Ian G. Mills, Brian J. Peter, Yvonne Vallis, Gerrit J. K. Praefcke, Philip R. Evans,  
1261 and Harvey T. McMahon. 2002. “Curvature of Clathrin-Coated Pits Driven by Epsin.” *Nature*  
1262 419(6905):361–66.
- 1263 Friedrich, Förster, Medalia Ohad, Zauberman Nathan, Baumeister Wolfgang, and Fass Deborah. 2005.  
1264 “Retrovirus Envelope Protein Complex Structure in Situ Studied by Cryo-Electron Tomography.”  
1265 *Proceedings of the National Academy of Sciences* 102(13):4729–34.
- 1266 Gautier, Romain, Dominique Douguet, Bruno Antonny, and Guillaume Drin. 2008. “HELIQUEST: A  
1267 Web Server to Screen Sequences with Specific Alpha-Helical Properties.” *Bioinformatics*  
1268 (*Oxford, England*) 24(18):2101–2.
- 1269 Hagen, Wim J. H., William Wan, and John A. G. Briggs. 2017. “Implementation of a Cryo-Electron  
1270 Tomography Tilt-Scheme Optimized for High Resolution Subtomogram Averaging.” *Journal of*  
1271 *Structural Biology* 197(2):191–98.
- 1272 Hamed, Mohamed and Wolfram Antonin. 2021. “Dunking into the Lipid Bilayer: How Direct  
1273 Membrane Binding of Nucleoporins Can Contribute to Nuclear Pore Complex Structure and  
1274 Assembly.” *Cells* 10(12):3601.



- 1275 Hartwell, Leland H., John J. Hopfield, Stanislas Leibler, and Andrew W. Murray. 1999. “From  
1276 Molecular to Modular Cell Biology.” *Nature* 402(6761):C47–52.
- 1277 Hodge, Christine A., Vineet Choudhary, Michael J. Wolyniak, John J. Scarcelli, Roger Schneider, and  
1278 Charles N. Cole. 2010. “Integral Membrane Proteins Brr6 and Apq12 Link Assembly of the  
1279 Nuclear Pore Complex to Lipid Homeostasis in the Endoplasmic Reticulum.” *Journal of Cell*  
1280 *Science* 123(1):141–51.
- 1281 Huang, Gaoxingyu, Xiechao Zhan, Chao Zeng, Ke Liang, Xuechen Zhu, Yanyu Zhao, Pan Wang, Qifan  
1282 Wang, Qiang Zhou, Qinghua Tao, Minhao Liu, Jianlin Lei, Chuangye Yan, and Yigong Shi. 2021.  
1283 “Cryo-EM Structure of the Inner Ring from *Xenopus Laevis* Nuclear Pore Complex.” *BioRxiv*.
- 1284 Huang, Gaoxingyu, Xiechao Zhan, Chao Zeng, Xuechen Zhu, Ke Liang, Yanyu Zhao, Pan Wang, Qifan  
1285 Wang, Qiang Zhou, Qinghua Tao, Minhao Liu, Jianlin Lei, Chuangye Yan, and Yigong Shi. 2022.  
1286 “Cryo-EM Structure of the Nuclear Ring from *Xenopus Laevis* Nuclear Pore Complex.” *Cell*  
1287 *Research*.
- 1288 Jakub, Cibulka, Bisaccia Fabio, Radisavljević Katarina, Gudino Carrillo Ricardo M., and Köhler Alwin.  
1289 2022. “Assembly Principle of a Membrane-Anchored Nuclear Pore Basket Scaffold.” *Science*  
1290 *Advances* 8(6):eabl6863.
- 1291 Jumper, John, Richard Evans, Alexander Pritzel, Tim Green, Michael Figurnov, Olaf Ronneberger,  
1292 Kathryn Tunyasuvunakool, Russ Bates, Augustin Židek, Anna Potapenko, Alex Bridgland,  
1293 Clemens Meyer, Simon A. A. Kohl, Andrew J. Ballard, Andrew Cowie, Bernardino Romera-  
1294 Paredes, Stanislav Nikolov, Rishub Jain, Jonas Adler, Trevor Back, Stig Petersen, David Reiman,  
1295 Ellen Clancy, Michal Zielinski, Martin Steinegger, Michalina Pacholska, Tamas Berghammer,  
1296 Sebastian Bodenstern, David Silver, Oriol Vinyals, Andrew W. Senior, Koray Kavukcuoglu,  
1297 Pushmeet Kohli, and Demis Hassabis. 2021. “Highly Accurate Protein Structure Prediction with  
1298 AlphaFold.” *Nature* 596(7873):583–89.
- 1299 Kressler, Dieter, Ed Hurt, and Jochen Bassler. 2010. “Driving Ribosome Assembly.” *Biochimica et*  
1300 *Biophysica Acta* 1803(6):673–83.
- 1301 Laudermilch, Ethan, Pei-Ling Tsai, Morven Graham, Elizabeth Turner, Chenguang Zhao, and Christian  
1302 Schlieker. 2016. “Dissecting Torsin/Cofactor Function at the Nuclear Envelope: A Genetic  
1303 Study.” *Molecular Biology of the Cell* 27(25):3964–71.
- 1304 Li, Zongqiang, Shuaijiabin Chen, Liang Zhao, Guoqiang Huang, Xiong Pi, Shan Sun, Peiyi Wang, and  
1305 Sen-Fang Sui. 2021. “Near Atomic Structure of the Inner Ring of the *Saccharomyces Cerevisiae*  
1306 Nuclear Pore Complex.” *BioRxiv*.
- 1307 Lin, Daniel H. and André Hoelz. 2019. “The Structure of the Nuclear Pore Complex (An Update).”  
1308 *Annual Review of Biochemistry* 88:725–83.
- 1309 Liu, Gaowen, Mei Yun Jacy Yong, Marina Yurieva, Kandhadayar Gopalan Srinivasan, Jaron Liu, John  
1310 Soon Yew Lim, Michael Poidinger, Graham Daniel Wright, Francesca Zolezzi, Hyungwon Choi,

- 1311 Norman Pavelka, and Giulia Rancati. 2015. “Gene Essentiality Is a Quantitative Property Linked  
1312 to Cellular Evolvability.” *Cell* 163(6):1388–99.
- 1313 Lone, Museer A., Aaron E. Atkinson, Christine A. Hodge, Stéphanie Cottier, Fernando Martínez-  
1314 Montañés, Shelley Maithel, Laurent Mène-Saffrané, Charles N. Cole, and Roger Schneiter. 2015.  
1315 “Yeast Integral Membrane Proteins Apq12, Brl1, and Brr6 Form a Complex Important for  
1316 Regulation of Membrane Homeostasis and Nuclear Pore Complex Biogenesis.” *Eukaryotic Cell*  
1317 14(12):1217–27.
- 1318 Makio, Tadashi, Leslie H. Stanton, Cheng-Chao Lin, David S. Goldfarb, Karsten Weis, and Richard W.  
1319 Wozniak. 2009. “The Nucleoporins Nup170p and Nup157p Are Essential for Nuclear Pore  
1320 Complex Assembly.” *Journal of Cell Biology* 185(3):459–73.
- 1321 Marelli, Marcello, C. Patrick Lusk, Honey Chan, John D. Aitchison, and Richard W. Wozniak. 2001.  
1322 “A Link between the Synthesis of Nucleoporins and the Biogenesis of the Nuclear Envelope.”  
1323 *Journal of Cell Biology* 153(4):709–24.
- 1324 Mastronarde, David N. 2003. “SerialEM: A Program for Automated Tilt Series Acquisition on Tecnai  
1325 Microscopes Using Prediction of Specimen Position.” *Microscopy and Microanalysis*  
1326 9(S02):1182–83.
- 1327 Mastronarde, David N. and Susannah R. Held. 2017. “Automated Tilt Series Alignment and  
1328 Tomographic Reconstruction in IMOD.” *Journal of Structural Biology* 197(2):102–13.
- 1329 Mészáros, Noémi, Jakub Cibulka, Maria Jose Mendiburo, Anete Romanuska, Maren Schneider, and  
1330 Alwin Köhler. 2015. “Nuclear Pore Basket Proteins Are Tethered to the Nuclear Envelope and  
1331 Can Regulate Membrane Curvature.” *Developmental Cell* 33(3):285–98.
- 1332 Morin, Andrew, Ben Eisenbraun, Jason Key, Paul C. Sanschagrin, Michael A. Timony, Michelle  
1333 Ottaviano, and Piotr Sliz. 2013. “Cutting Edge: Collaboration Gets the Most out of Software.”  
1334 *ELife* 2:e01456.
- 1335 Mosalaganti, Shyamal, Agnieszka Obarska-Kosinska, Marc Siggel, Beata Turonova, Christian E.  
1336 Zimmerli, Katarzyna Buczak, Florian H. Schmidt, Erica Margiotta, Marie-Therese Mackmull,  
1337 Wim Hagen, Gerhard Hummer, Martin Beck, and Jan Kosinski. 2021. “Artificial Intelligence  
1338 Reveals Nuclear Pore Complexity.” *BioRxiv* 2021.10.26.465776.
- 1339 Nickell, Stephan, Friedrich Förster, Alexandros Linaroudis, William Del Net, Florian Beck, Reiner  
1340 Hegerl, Wolfgang Baumeister, and Jürgen M. Plitzko. 2005. “TOM Software Toolbox:  
1341 Acquisition and Analysis for Electron Tomography.” *Journal of Structural Biology* 149(3):227–  
1342 34.
- 1343 Nishimura, Kohei, Tatsuo Fukagawa, Haruhiko Takisawa, Tatsuo Kakimoto, and Masato Kanemaki.  
1344 2009. “An Auxin-Based Degron System for the Rapid Depletion of Proteins in Nonplant Cells.”  
1345 *Nature Methods* 6(12):917–22.
- 1346 Onischenko, Evgeny, Elad Noor, Jonas S. Fischer, Ludovic Gillet, Matthias Wojtynek, Pascal

- 1347 Vallotton, and Karsten Weis. 2020. “Maturation Kinetics of a Multiprotein Complex Revealed by  
1348 Metabolic Labeling.” *Cell* 183(7):1785-1800.e26.
- 1349 Onischenko, Evgeny, Leslie H. Stanton, Alexis S. Madrid, Thomas Kieselbach, and Karsten Weis.  
1350 2009. “Role of the Ndc1 Interaction Network in Yeast Nuclear Pore Complex Assembly and  
1351 Maintenance.” *The Journal of Cell Biology* 185(3):475–91.
- 1352 Onischenko, Evgeny, Jeffrey H. Tang, Kasper R. Andersen, Kevin E. Knockenhauer, Pascal Vallotton,  
1353 Carina P. Derrer, Annemarie Kralt, Christopher F. Mugler, Leon Y. Chan, Thomas U. Schwartz,  
1354 and Karsten Weis. 2017. “Natively Unfolded FG Repeats Stabilize the Structure of the Nuclear  
1355 Pore Complex.” *Cell* 171(4):904-917.e19.
- 1356 Otsuka, Shotaro, Khanh Huy Bui, Martin Schorb, M. Julius Hossain, Antonio Z. Politi, Birgit Koch,  
1357 Mikhail Eltsov, Martin Beck, and Jan Ellenberg. 2016. “Nuclear Pore Assembly Proceeds by an  
1358 Inside-out Extrusion of the Nuclear Envelope.” *ELife* 5(September2016):1–23.
- 1359 Otsuka, Shotaro and Jan Ellenberg. 2018. “Mechanisms of Nuclear Pore Complex Assembly - Two  
1360 Different Ways of Building One Molecular Machine.” *FEBS Letters* 592(4):475–88.
- 1361 Peeters, Bas W. A., Alexandra C. A. Piët, and Maarten Fornerod. 2022. “Generating Membrane  
1362 Curvature at the Nuclear Pore: A Lipid Point of View.” *Cells* 11(3).
- 1363 Peterson, Amelia C., Jason D. Russell, Derek J. Bailey, Michael S. Westphall, and Joshua J. Coon.  
1364 2012. “Parallel Reaction Monitoring for High Resolution and High Mass Accuracy Quantitative,  
1365 Targeted Proteomics.” *Molecular & Cellular Proteomics : MCP* 11(11):1475–88.
- 1366 Petrovic, Stefan, Dipanjan Samanta, Thibaud Perriches, Christopher J. Bley, Karsten Thierbach, Bonnie  
1367 Brown, Si Nie, George W. Mobbs, Taylor A. Stevens, Xiaoyu Liu, and André Hoelz. 2021.  
1368 “Architecture of the Linker-Scaffold in the Nuclear Pore.” *BioRxiv*.
- 1369 Pettersen, Eric F., Thomas D. Goddard, Conrad C. Huang, Gregory S. Couch, Daniel M. Greenblatt,  
1370 Elaine C. Meng, and Thomas E. Ferrin. 2004. “UCSF Chimera--a Visualization System for  
1371 Exploratory Research and Analysis.” *Journal of Computational Chemistry* 25(13):1605–12.
- 1372 Popken, Petra, Ali Ghavami, Patrick R. Onck, Bert Poolman, and Liesbeth M. Veenhoff. 2015. “Size-  
1373 Dependent Leak of Soluble and Membrane Proteins through the Yeast Nuclear Pore Complex.”  
1374 *Molecular Biology of the Cell* 26(7):1386–94.
- 1375 Rajoo, Sasikumar, Pascal Vallotton, Evgeny Onischenko, and Karsten Weis. 2018. “Stoichiometry and  
1376 Compositional Plasticity of the Yeast Nuclear Pore Complex Revealed by Quantitative  
1377 Fluorescence Microscopy.” *Proceedings of the National Academy of Sciences* 115(17):E3969–77.
- 1378 Rampello, Anthony J., Ethan Laudermitch, Nidhi Vishnoi, Sarah M. Prophet, Lin Shao, Chenguang  
1379 Zhao, C. Patrick Lusk, and Christian Schlieker. 2020. “Torsin ATPase Deficiency Leads to  
1380 Defects in Nuclear Pore Biogenesis and Sequestration of MLF2.” *The Journal of Cell Biology*  
1381 219(6).
- 1382 Romanauska, Anete and Alwin Köhler. 2018. “The Inner Nuclear Membrane Is a Metabolically Active

- 1383 Territory That Generates Nuclear Lipid Droplets.” *Cell* 174(3):700-715.e18.
- 1384 Rothballer, Andrea and Ulrike Kutay. 2013. “Poring over Pores: Nuclear Pore Complex Insertion into  
1385 the Nuclear Envelope.” *Trends in Biochemical Sciences* 38(6):292–301.
- 1386 Ryan, Kathryn J., J. Michael McCaffery, and Susan R. Wente. 2003. “The Ran GTPase Cycle Is  
1387 Required for Yeast Nuclear Pore Complex Assembly.” *The Journal of Cell Biology* 160(7):1041–  
1388 53.
- 1389 Saitoh, Yoh Hei, Kaoru Ogawa, and Takeharu Nishimoto. 2005. “Brl1p - A Novel Nuclear Envelope  
1390 Protein Required for Nuclear Transport.” *Traffic* 6(6):502–17.
- 1391 Scarcelli, John J., Christine A. Hodge, and Charles N. Cole. 2007. “The Yeast Integral Membrane  
1392 Protein Apq12 Potentially Links Membrane Dynamics to Assembly of Nuclear Pore Complexes.”  
1393 *Journal of Cell Biology* 178(5):799–812.
- 1394 Schindelin, Johannes, Ignacio Arganda-Carreras, Erwin Frise, Verena Kaynig, Mark Longair, Tobias  
1395 Pietzsch, Stephan Preibisch, Curtis Rueden, Stephan Saalfeld, Benjamin Schmid, Jean-Yves  
1396 Tinevez, Daniel James White, Volker Hartenstein, Kevin Eliceiri, Pavel Tomancak, and Albert  
1397 Cardona. 2012. “Fiji: An Open-Source Platform for Biological-Image Analysis.” *Nature Methods*  
1398 9(7):676–82.
- 1399 Schooley, Allana, Benjamin Vollmer, and Wolfram Antonin. 2012. “Building a Nuclear Envelope at  
1400 the End of Mitosis: Coordinating Membrane Reorganization, Nuclear Pore Complex Assembly,  
1401 and Chromatin de-Condensation.” *Chromosoma* 121(6):539–54.
- 1402 Schuller, Anthony P., Matthias Wojtynek, David Mankus, Meltem Tatli, Rafael Kronenberg-Tenga,  
1403 Saroj G. Regmi, Phat V Dip, Abigail K. R. Lytton-Jean, Edward J. Brignole, Mary Dasso, Karsten  
1404 Weis, Ohad Medalia, and Thomas U. Schwartz. 2021. “The Cellular Environment Shapes the  
1405 Nuclear Pore Complex Architecture.” *Nature* 598(7882):667–71.
- 1406 Strunk, Bethany S. and Katrin Karbstein. 2009. “Powering through Ribosome Assembly.” *RNA (New*  
1407 *York, N.Y.)* 15(12):2083–2104.
- 1408 Tackett, Alan J., Jeffrey A. DeGrasse, Matthew D. Sekedat, Marlene Oeffinger, Michael P. Rout, and  
1409 Brian T. Chait. 2005. “I-DIRT, a General Method for Distinguishing between Specific and  
1410 Nonspecific Protein Interactions.” *Journal of Proteome Research* 4(5):1752–56.
- 1411 Tai, Linhua, Yun Zhu, He Ren, Xiaojun Huang, Chuanmao Zhang, and Fei Sun. 2022. “8 Å Structure  
1412 of the Outer Rings of the *Xenopus Laevis* Nuclear Pore Complex Obtained by Cryo-EM and AI.”  
1413 *Protein & Cell*.
- 1414 Thaller, David J. and C. Patrick Lusk. 2018. “Fantastic Nuclear Envelope Herniations and Where to  
1415 Find Them.” *Biochemical Society Transactions* 46(4):877–89.
- 1416 Thaller, David J., Danqing Tong, Christopher J. Marklew, Nicholas R. Ader, Philip J. Mannino, Sapan  
1417 Borah, Megan C. King, Barbara Ciani, and C. Patrick Lusk. 2021. “Direct Binding of ESCRT  
1418 Protein Chm7 to Phosphatidic Acid-Rich Membranes at Nuclear Envelope Herniations.” *The*

- 1419 *Journal of Cell Biology* 220(3).
- 1420 Upla, Paula, Seung Joong Kim, Parthasarathy Sampathkumar, Kaushik Dutta, Sean M. Cahill, Ilan E.  
1421 Chemmama, Rosemary Williams, Jeffrey B. Bonanno, William J. Rice, David L. Stokes, David  
1422 Cowburn, Steven C. Almo, Andrej Sali, Michael P. Rout, and Javier Fernandez-Martinez. 2017.  
1423 “Molecular Architecture of the Major Membrane Ring Component of the Nuclear Pore Complex.”  
1424 *Structure (London, England : 1993)* 25(3):434–45.
- 1425 Vallotton, Pascal, Sasikumar Rajoo, Matthias Wojtynek, Evgeny Onischenko, Annemarie Kralt, Carina  
1426 Patrizia Derrer, and Karsten Weis. 2019. “Mapping the Native Organization of the Yeast Nuclear  
1427 Pore Complex Using Nuclear Radial Intensity Measurements.” *Proceedings of the National  
1428 Academy of Sciences* 116(29):14606 LP – 14613.
- 1429 Verzijlbergen, Kitty F., Victoria Menendez-Benito, Tibor van Welsem, Sjoerd J. van Deventer, Derek  
1430 L. Lindstrom, Huib Ovaa, Jacques Neefjes, Daniel E. Gottschling, and Fred van Leeuwen. 2010.  
1431 “Recombination-Induced Tag Exchange to Track Old and New Proteins.” *Proceedings of the  
1432 National Academy of Sciences* 107(1):64 LP – 68.
- 1433 Voeltz, Gia K., William A. Prinz, Yoko Shibata, Julia M. Rist, and Tom A. Rapoport. 2006. “A Class  
1434 of Membrane Proteins Shaping the Tubular Endoplasmic Reticulum.” *Cell* 124(3):573–86.
- 1435 Vollmer, Benjamin, Michael Lorenz, Daniel Moreno-Andrés, Mona Bodenhöfer, Paola De Magistris,  
1436 Susanne Adina Astrinidis, Allana Schooley, Matthias Flötenmeyer, Sebastian Leptihn, and  
1437 Wolfram Antonin. 2015. “Nup153 Recruits the Nup107-160 Complex to the Inner Nuclear  
1438 Membrane for Interphasic Nuclear Pore Complex Assembly.” *Developmental Cell* 33(6):717–28.
- 1439 Wagner, Felix R., Reika Watanabe, Ruud Schampers, Digvijay Singh, Hans Persoon, Miroslava  
1440 Schaffer, Peter Fruhstorfer, Jürgen Plitzko, and Elizabeth Villa. 2020. “Preparing Samples from  
1441 Whole Cells Using Focused-Ion-Beam Milling for Cryo-Electron Tomography.” *Nature  
1442 Protocols* 15(6):2041–70.
- 1443 Wang, Ning, Lindsay D. Clark, Yuan Gao, Michael M. Kozlov, Tom Shemesh, and Tom A. Rapoport.  
1444 2021. “Mechanism of Membrane-Curvature Generation by ER-Tubule Shaping Proteins.” *Nature  
1445 Communications* 12(1):568.
- 1446 Wang, Songyu, Hanna Tukachinsky, Fabian B. Romano, and Tom A. Rapoport. 2016. “Cooperation of  
1447 the ER-Shaping Proteins Atlastin, Lunapark, and Reticulons to Generate a Tubular Membrane  
1448 Network” edited by M. Kozlov. *ELife* 5:e18605.
- 1449 Waterhouse, Andrew M., James B. Procter, David M. A. Martin, Michèle Clamp, and Geoffrey J.  
1450 Barton. 2009. “Jalview Version 2—a Multiple Sequence Alignment Editor and Analysis  
1451 Workbench.” *Bioinformatics* 25(9):1189–91.
- 1452 Wentz, Susan R. and Michael P. Rout. 2010. “The Nuclear Pore Complex and Nuclear Transport.” *Cold  
1453 Spring Harbor Perspectives in Biology* 2(10):a000562.
- 1454 Winey, M., D. Yarar, T. H. Giddings Jr, and D. N. Mastrorade. 1997. “Nuclear Pore Complex Number

- 1455 and Distribution throughout the *Saccharomyces Cerevisiae* Cell Cycle by Three-Dimensional  
1456 Reconstruction from Electron Micrographs of Nuclear Envelopes.” *Molecular Biology of the Cell*  
1457 8(11):2119–32.
- 1458 Wright, R., M. Basson, L. D’Ari, and J. Rine. 1988. “Increased Amounts of HMG-CoA Reductase  
1459 Induce ‘Karmellae’: A Proliferation of Stacked Membrane Pairs Surrounding the Yeast Nucleus.”  
1460 *The Journal of Cell Biology* 107(1):101–14.
- 1461 Zhang, Wanlu, Azqa Khan, Jlenia Vitale, Annett Neuner, Kerstin Rink, Christian Lüchtenborg, Britta  
1462 Brügger, Thomas H. Söllner, and Elmar Schiebel. 2021. “A Short Perinuclear Amphipathic  $\alpha$ -  
1463 Helix in Apq12 Promotes Nuclear Pore Complex Biogenesis.” *Open Biology* 11(11).
- 1464 Zhang, Wanlu, Annett Neuner, Diana Rüttnick, Timo Sachsenheimer, Christian Lüchtenborg, Britta  
1465 Brügger, and Elmar Schiebel. 2018. “Brr6 and Brl1 Locate to Nuclear Pore Complex Assembly  
1466 Sites to Promote Their Biogenesis.” *Journal of Cell Biology* 217(3):877–94.
- 1467 Zhu, Xuechen, Gaoxingyu Huang, Chao Zeng, Xiechao Zhan, Ke Liang, Yanyu Zhao, Pan Wang, Qifan  
1468 Wang, Qiang Zhou, Qinghua Tao, Minhao Liu, Jianlin Lei, Chuangye Yan, and Yigong Shi. 2022.  
1469 “Near-Atomic Structure of the Cytoplasmic Ring of the *Xenopus Laevis* Nuclear Pore Complex.”  
1470 *BioRxiv*.
- 1471 Zimmerli, Christian, Allegretti Matteo, Rantos Vasileios, Goetz Sara K., Obarska-Kosinska Agnieszka,  
1472 Zagoriy Ievgeniia, Halavatyi Aliaksandr, Hummer Gerhard, Mahamid Julia, Kosinski Jan, and  
1473 Beck Martin. 2022. “Nuclear Pores Dilate and Constrict in Cellulo.” *Science* 374(6573):eabd9776.  
1474
